# Supplementary material
Source: PubMed Central journal article supplement (PMC6466826)
Supplement: ml8b00574_si_001.pdf [file ml8b00574_si_001.pdf]

## Supporting Information

### Novel Phenyl diazenyl Fibrate Analogues as PPAR $\alpha/\gamma/\delta$ Pan-Agonists for the Amelioration of Metabolic Syndrome

Letizia Giampietro<sup>a,\*</sup>, Antonio Laghezza<sup>b</sup>, Carmen Cerchia<sup>c</sup>, Rosalba Florio<sup>a,d</sup>, Lucia Recinella<sup>a</sup>, Fabio Capone<sup>c</sup>, Alessandra Ammazalorso<sup>a</sup>, Isabella Bruno<sup>a</sup>, Barbara De Filippis<sup>a</sup>, Marialuigia Fantacuzzi<sup>a</sup>, Claudio Ferrante<sup>a</sup>, Cristina Maccallini<sup>a</sup>, Paolo Tortorella<sup>b</sup>, Fabio Verginelli<sup>a,d</sup>, Luigi Brunetti<sup>a</sup>, Alessandro Cama<sup>a,d</sup>, Rosa Amoroso<sup>a</sup>, Fulvio Loiodice<sup>b,\*\*</sup>, Antonio Lavecchia<sup>c,\*\*\*</sup>

<sup>a</sup> Department of Pharmacy, University of Chieti "G. d'Annunzio", Via Dei Vestini, 31, 66100, Chieti, Italy.

<sup>b</sup> Department of Pharmacy-Drug Science, University of Bari "Aldo Moro", Via E. Orabona, 4, 70126, Bari, Italy.

<sup>c</sup> Department of Pharmacy, "Drug Discovery" Laboratory, University of Napoli "Federico II", Via D. Montesano, 49, 80131, Napoli, Italy.

<sup>d</sup> Center of Aging Science and Translational Medicine (CeSI-MeT), University of Chieti "G. d'Annunzio, Via Luigi Polacchi 11, 66100 Chieti, Italy

\* Author for correspondence: [letizia.giampietro@unich.it](mailto:letizia.giampietro@unich.it)

\*\* Author for correspondence: [fulvio.loiodice@uniba.it](mailto:fulvio.loiodice@uniba.it)

\*\*\* Author for correspondence: [antonio.lavecchia@unina.it](mailto:antonio.lavecchia@unina.it)

## Table of Contents

|                                                                                                                                            |     |
|--------------------------------------------------------------------------------------------------------------------------------------------|-----|
| <b>Figure S1.</b> Chemical structures of representative fibrates, thiazolidinediones and phenoxyacetic acid derivatives.....               | S3  |
| <b>Experimental Procedures</b> .....                                                                                                       | S4  |
| <b>Biological Methods</b> .....                                                                                                            | S23 |
| <b>Computational Chemistry</b> .....                                                                                                       | S27 |
| <b>Figure S2.</b> Docking of <b>12a</b> into the LBD of PPAR $\alpha$ (A), PPAR $\gamma$ (B) and PPAR $\delta$ (C) crystal structures..... | S28 |
| <b>Table S1.</b> Docking and clustering outcomes for each of the investigated complexes.....                                               | S29 |
| <b>Figure S3.</b> 2D ligand-interaction diagram of compound <b>12a</b> into the PPAR $\alpha$ binding pocket.....                          | S29 |
| <b>Figure S4.</b> 2D ligand-interaction diagram of compound <b>12a</b> into the PPAR $\delta$ binding pocket.....                          | S30 |
| <b>Figure S5.</b> 2D ligand-interaction diagram of compound <b>12a</b> into the PPAR $\gamma$ binding pocket.....                          | S31 |
| <b>Table S2.</b> Major interactions between <b>12a</b> and PPAR $\alpha$ , PPAR $\delta$ and PPAR $\gamma$ .....                           | S32 |
| <b>Valence-bond (or resonance) approach to azobenzene system</b> (Figure S6).....                                                          | S33 |
| <b>Binding mode of compound 12a into PPAR<math>\gamma</math> LBD</b> (Figure S7) .....                                                     | S34 |
| <b>Figure S8.</b> $^1\text{H}$ and $^{13}\text{C}$ spectra of final compounds <b>11b-g</b> and <b>12a-f</b> .....                          | S35 |
| <b>References</b> .....                                                                                                                    | S59 |

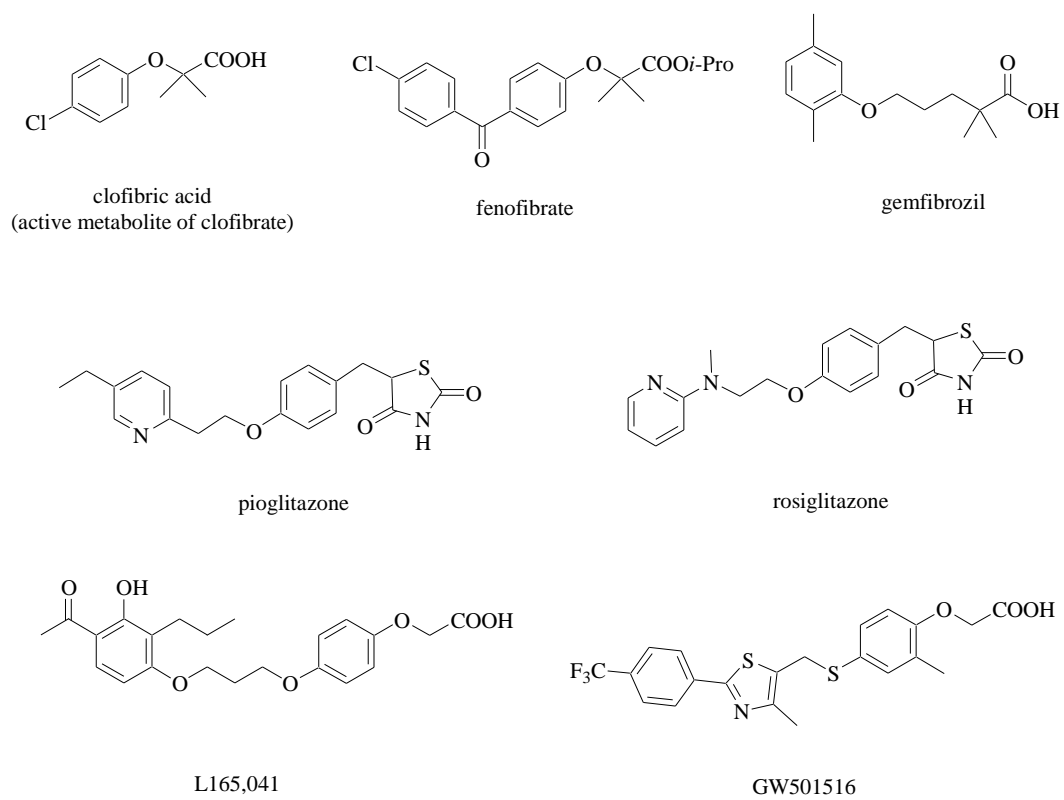

**Figure S1.** Chemical structures of representative fibrates, thiazolidinediones and phenoxyacetic acid derivatives.

## Experimental Procedures

### *General information*

Büchi B-540 apparatus was used to measure melting points and these values were uncorrected. Infrared spectra were recorded on a FT-IR 1600 Perkin–Elmer spectrometer. A Varian instrument was utilized to run NMR spectra at 300 MHz and chemical shifts ( $\delta$ ) are reported in ppm. Microanalyses were effected with an Eurovector Euro EA 3000 model analyser; the analytical results were not over 0.4% of the theoretical values. All commercial and cell culture reagents, medium and reference compounds were obtained from Sigma-Aldrich (Milan, Italy).

### *General procedure for the preparation of phenols 2a-g*

*p*-Substituted aniline (0.5 g, 3.6 mmol) was dissolved in 6N hydrochloric acid (1.5 mL), then a solution of sodium nitrite (0.37 g, 5.3 mmol) in water (2 mL) was slowly added at 0–5 °C. The mixture was stirred for 1 h, filtered and the filtrate was then added dropwise to phenol (0.33 g, 3.5 mmol) in 4N sodium hydroxide (2.5 mL) at 0–5°C. The mixture was stirred for further 1 h and filtered to obtain an intense red precipitate that was washed several times with water. The residue was solubilized in 50 mL of ethanol/water (1:1,v/v), acidified with concentrated hydrochloric acid until a precipitate is formed. At last, the precipitate was filtrated and dried.

### *4-[(E)-Phenyldiazenyl]phenol (2a)*

Characterization data are in agreement with those reported in the literature.<sup>1</sup>

### *4-[(E)-(4-Chlorophenyl)diazenyl]phenol (2b)*

Red solid, 56% yield; m.p. 149-151 °C; IR (KBr): 3229 (OH), 1585 (N=N) cm<sup>-1</sup>; <sup>1</sup>H-NMR (CDCl<sub>3</sub>) δ 6.94 (d, 2H, J=9.0 Hz, CHar), 7.46 (d, 2H, J=8.7 Hz, CHar), 7.82 (d, 2H, J=9.0 Hz, CHar), 7.86 (d, 2H, J= 8.7 Hz, CHar); <sup>13</sup>C-NMR (CDCl<sub>3</sub>) δ 116.1 (CHar), 124.1, 125.3, 129.5, 136.3 (CHar), 147.3 (Car-N=N), 151.2 (N=N-Car), 158.6 (Car). Anal. calcd for C<sub>12</sub>H<sub>9</sub>ClN<sub>2</sub>O: C 61.95, H 3.90, N 12.04. Found C 61.93, H 3.90, N 12.07.

*4-[(E)-(4-Bromophenyl)diazenyl]phenol (2c)*

Red solid, 38% yield; m.p. 147-150 °C; IR (KBr): 3230 (OH), 1587 (N=N) cm<sup>-1</sup>; <sup>1</sup>H-NMR (CDCl<sub>3</sub>) δ 6.94 (d, 2H, J=8.7 Hz CHar), 7.62 (d, 2H, J=8.7 Hz CHar), 7.75 (d, 2H, J=9 Hz CHar), 7.87 (d, 2H, J=9 Hz CHar); <sup>13</sup>C-NMR (CDCl<sub>3</sub>) δ 116.1, 124.3, 125.4, 132.5 (CHar), 147.3, (Car), 151.6 (Car-N=N), 152.5 (N=N-Car), 158.6 (Car). Anal. calcd for C<sub>12</sub>H<sub>9</sub>BrN<sub>2</sub>O: C 52.01, H 3.27 N 10.11. Found C 52.03, H 3.29 N 10.15.

*4-[(E)-[4-(Trifluoromethyl)phenyl]diazenyl]phenol (2d)*

Red solid, 53% yield; m.p. 149-151°C; IR (KBr): 3225 (OH), 1594 (N=N) cm<sup>-1</sup>; <sup>1</sup>H-NMR (CDCl<sub>3</sub>) δ 6.93 (d, 2H, J=8.7 Hz, CHar), 7.81 (d, 2H, J=8.2 Hz, CHar), 7.87 (d, 2H, J=8.7 Hz, CHar), 7.98 (d, 2H, J=8.2 Hz, CHar); <sup>13</sup>C-NMR (CDCl<sub>3</sub>) δ 115.7, 122.6 (CHar), 122.9, 123.1 (CF<sub>3</sub>), 125.3 (CHar), 126.1, 126.2 (Car), 137.9 (CHar), 146.2 (Car-N=N), 152.8 (Car-N=N), 161.9 (Car). Anal. calcd for C<sub>13</sub>H<sub>9</sub>F<sub>3</sub>N<sub>2</sub>O: C 58.65, H 3.41, N 10.52. Found C 58.60, H 3.43, N 10.50.

*4-[(E)-(4-Hydroxyphenyl)diazenyl]benzotrile (2e)*

Yellow solid; 52% yield; m.p. 175-178°C; IR (KBr): 3322 (OH), 2236 (CN), 1502 (N=N) cm<sup>-1</sup>; <sup>1</sup>H-NMR (CD<sub>3</sub>OD) δ 6.93 (d, 2H, J=8.7 Hz, CHar), 7.88 (d, 2H, J=6.6 Hz, CHar), 7.92 (d, 2H, J=6.6 Hz, CHar), 7.95 (d, 2H, J=8.7 Hz, CHar); <sup>13</sup>C-NMR (CD<sub>3</sub>OD) δ 112.9 (Car),

115.8 (CHar), 118.3 (CN), 122.9, 125.6, 133.3 (CHar), 146.2 (Car-N=N), 155.2 (N=N-Car), 162.3 (Car). Anal. calcd for C<sub>13</sub>H<sub>9</sub>N<sub>3</sub>O: C 69.95, H 4.06, N 18.82. Found C 69.97, H 4.05, N 18.80.

*4-[(E)-(4-Nitrophenyl)diazenyl]phenol (2f)*

Bronze solid; 44% yield; m.p. 209- 210°C; IR (KBr): 3402 (OH), 1583 (NO), 1508 (N=N), 1335 (NO) cm<sup>-1</sup>; <sup>1</sup>H-NMR (CDCl<sub>3</sub>) δ 6.93 (d, 2H, J=9 Hz, CHar), 7.87 (d, 2H, J=9 Hz, CHar), 7.97 (d, 2H, J=9 Hz, CHar), 8.36 (d, 2H, J=9 Hz, CHar); <sup>13</sup>C-NMR (CDCl<sub>3</sub>) δ 116.3, 123.4, 125.0, 126.1 (CHar), 143.7 (Car), 146.8 (Car-N=N), 153.7 (Car-N=N), 156.2 (Car). Anal. calcd for C<sub>12</sub>H<sub>9</sub>N<sub>3</sub>O<sub>3</sub>: C 59.26, H 3.73, N 17.28. Found C 59.24, H 3.75, N 17.30.

*4-[(E)-(4-Methoxyphenyl)diazenyl]phenol (2g)*

Brick red; 66% yield; m.p. 138-140°C; IR (KBr): 3418 (ν OH), 1593 (ν N=N), 1241 (ν C-O) cm<sup>-1</sup>; <sup>1</sup>H-NMR (CD<sub>3</sub>OD) δ 3.86 (s, 3H, OCH<sub>3</sub>), 6.88 (d, 2H, J=9.9 Hz, CHar), 7.03 (d, 2H, J=9.9 Hz, CHar), 7.75 (d, 2H, J=9 Hz, CHar), 7.81 (d, 2H, J=9 Hz, CHar); <sup>13</sup>C-NMR (CD<sub>3</sub>OD) δ 54.8 (OCH<sub>3</sub>), 114.0, 115.9, 123.9, 124.4 (CHar), 145.9 (Car-N=N), 147.1 (Car-N=N), 161.8 (Car). Anal. calcd for C<sub>13</sub>H<sub>12</sub>N<sub>2</sub>O<sub>2</sub>: C 68.41, H 5.30, N 12.27. Found 68.39, H 5.31, N 12.25.

*General synthesis of alcohols 3a-f*

To a solution of the *p*-substituted aniline (**1a-f**) (2.16 mmol) in CH<sub>2</sub>Cl<sub>2</sub> (4 mL) was added Oxone® (4.3 mmol) dissolved in water (19 mL). The mixture was stirred under nitrogen at room temperature. Normally, when nitrosoarene was formed, the color of the solution turned to green. The two layers were separated and the aqueous phase was extracted with CH<sub>2</sub>Cl<sub>2</sub> (3 x 30 mL). The combined organic layers were washed with 1 N HCl, saturated sodium

bicarbonate solution, water, brine and dried with NaSO<sub>4</sub>. The solvent was removed under reduced pressure obtaining the corresponding nitrosoarene; it was labile and for this reason it was submitted to the next reaction without purification.

To the nitrosoarene (1.00 equiv) dissolved in acetic acid (15 mL) was added the 2-(4-aminophenyl)ethanol (1.00 equiv). The resulting mixture was stirred at room temperature for 24–48 h. To precipitate the product, a saturated sodium bicarbonate solution was added slowly. The mixture was extracted with CH<sub>2</sub>Cl<sub>2</sub> (3 x 30 mL). The combined organic layers were dried with NaSO<sub>4</sub>. After filtration, the solvent was evaporated and the residue was purified by column chromatography on silica gel (eluent cyclohexane/ethyl acetate 6:4) obtaining the desired products.

*2-{4-[(E)-Phenyldiazenyl]phenyl}ethanol (3a)*

Orange solid, 40% yield; m.p. 81-83 °C; IR (KBr) 3303 (OH), 1590 (N=N) cm<sup>-1</sup>; <sup>1</sup>H NMR (CDCl<sub>3</sub>) δ 2.96 (t, 2H, J = 6.6 Hz, OCH<sub>2</sub>CH<sub>2</sub>), 3.92 (t, 2H, J = 6.6 Hz, OCH<sub>2</sub>CH<sub>2</sub>), 7.38 (d, 2H, J = 8.7 Hz, CH<sub>ar</sub>), 7.50 (m, 3H, CH<sub>ar</sub>), 7.89 (m, 4H, CH<sub>ar</sub>); <sup>13</sup>C NMR (CDCl<sub>3</sub>) δ 39.3 (HOCH<sub>2</sub>CH<sub>2</sub>), 63.7 (HOCH<sub>2</sub>CH<sub>2</sub>), 123.0, 123.3, 129.3, 130.0, 131.1 (C<sub>ar</sub>), 142.2 (C<sub>ar</sub> CH<sub>2</sub>), 151.7 (C<sub>ar</sub>N), 152.9 (C<sub>ar</sub>N). Anal. calcd for C<sub>14</sub>H<sub>14</sub>N<sub>2</sub>O: C 74.31, H 6.24, N 12.38. Found C 74.30, H 6.27, N 12.40.

*2-{4-[(E)-(4-Chlorophenyl)diazenyl]phenyl}ethanol (3b)*

Orange solid, 86% yield; m.p. 150-152 °C; IR (KBr) 3300 (OH), 1550 (N=N) cm<sup>-1</sup>; <sup>1</sup>H NMR (CDCl<sub>3</sub>) δ 2.96 (t, 2H, J = 6.6 Hz, OCH<sub>2</sub>CH<sub>2</sub>), 3.92 (t, 2H, J = 6.6 Hz, OCH<sub>2</sub>CH<sub>2</sub>), 7.38 (d, 2H, J = 8.7 Hz, CH<sub>ar</sub>), 7.43 (d, 2H, J = 8.7 Hz, CH<sub>ar</sub>), 7.86 (m, 4H, CH<sub>ar</sub>); <sup>13</sup>C NMR (CDCl<sub>3</sub>) δ 39.3 (HOCH<sub>2</sub>CH<sub>2</sub>), 63.7 (HOCH<sub>2</sub>CH<sub>2</sub>), 123.4, 124.3, 129.6, 130.0 (C<sub>ar</sub>), 137.0

(CarCl), 142.6 (CarCH<sub>2</sub>), 151.2 (CarN), 151.5 (CarN). Anal. calcd for C<sub>14</sub>H<sub>13</sub>ClN<sub>2</sub>O: C 64.49, H 5.03, N 10.74. Found C 64.53, H 5.00, N 10.75.

*2-{4-[(E)-(4-Bromophenyl)diazenyl]phenyl}ethanol (3c)*

Orange solid, 30% yield; m.p. 148.0-148.5 °C; IR (KBr) 3255 (OH), 1557 (N=N) cm<sup>-1</sup>; <sup>1</sup>H NMR (CDCl<sub>3</sub>) δ 2.96 (t, 2H, J = 6.6 Hz, OCH<sub>2</sub>CH<sub>2</sub>), 3.92 (t, 2H, J = 6.6 Hz, OCH<sub>2</sub>CH<sub>2</sub>), 7.38 (d, 2H, J = 8.7 Hz, CHar), 7.64 (d, 2H, J = 8.7 Hz, CHar), 7.79 (d, 2H, J = 8.7 Hz, CHar), 7.84 (d, 2H, J = 8.7 Hz, CHar); <sup>13</sup>C NMR (CDCl<sub>3</sub>) δ 39.3 (HOCH<sub>2</sub>CH<sub>2</sub>), 63.6 (HOCH<sub>2</sub>CH<sub>2</sub>), 123.4, 124.5 (Car), 125.5 (CarBr), 130.1, 132.55 (Car), 142.6 (CarCH<sub>2</sub>), 151.5 (CarN), 151.6 (CarN). Anal. calcd for C<sub>14</sub>H<sub>13</sub>BrN<sub>2</sub>O: C 55.10, H 4.29, N 9.18. Found C 55.08, H 4.33, N 9.20.

*2-(4-{(E)-[4-(Trifluoromethyl)phenyl]diazenyl}phenyl)ethanol (3d)*

Red solid; 49% yield; m.p. 111.5-112.8 °C; IR (KBr): 3377 (OH), 1604 (N=N) cm<sup>-1</sup>; <sup>1</sup>H-NMR (CDCl<sub>3</sub>) δ 2.97 (d, 2H, J=6.3 Hz, CH<sub>2</sub>CH<sub>2</sub>OH), 3.93 (q, 2H, J=6.3 Hz, CH<sub>2</sub>CH<sub>2</sub>OH), 7.40 (d, 2H, J=8.4 Hz, CHar), 7.77 (d, 2H, J=9.06 Hz, CHar), 7.91 (d, 2H, J=8.4 Hz, CHar), 7.99 (d, 2H, J=9.06 Hz, CHar); <sup>13</sup>C-NMR (CDCl<sub>3</sub>) δ 39.3 (CH<sub>2</sub>CH<sub>2</sub>OH), 63.6 (CH<sub>2</sub>CH<sub>2</sub>OH), 115.5, 123.2, 123.6 (CHar), 126.5 (CF<sub>3</sub>), 130.1 (CHar), 132.5, 143.3, 151.4, 154.7 (Car). Anal. calcd for C<sub>15</sub>H<sub>13</sub>F<sub>3</sub>N<sub>2</sub>O: C 61.22, H 4.45, N 9.52. Found C 61.25, H 4.40 N 9.51.

*4-{(E)-[4-(2-Hydroxyethyl)phenyl]diazenyl}benzonitrile (3e)*

Orange solid; 51% yield; m.p. 159-160 °C; IR (KBr): 3488 (OH), 2236 (CN), 1599 (N=N) cm<sup>-1</sup>; <sup>1</sup>H-NMR (CDCl<sub>3</sub>) δ 2.97 (t, 2H, J = 6.6 Hz, OCH<sub>2</sub>CH<sub>2</sub>), 3.94 (t, 2H, J = 6.6 Hz, OCH<sub>2</sub>CH<sub>2</sub>), 7.4 (d, 2H, J = 8.7 Hz, CHar), 7.81 (d, 2H, J = 8.7 Hz, CHar), 7.91 (d, 2H, J = 8.7 Hz, CHar), 7.98 (d, 2H, J = 8.7 Hz, CHar); <sup>13</sup>C-NMR (CDCl<sub>3</sub>) δ 39.3 (CH<sub>2</sub>CH<sub>2</sub>OH), 63.5



(CH<sub>2</sub>CH<sub>2</sub>OH), 114.0 (CarCN), 118.8 (CN) 123.5, 123.6, 123.8, 130.2, 133.5 (Car), 143.8 (CarCN), 151.4 (CarN), 154.8 (CarN). Anal. calcd for C<sub>15</sub>H<sub>13</sub>N<sub>3</sub>O: C 71.70, H 5.21, N 16.72. Found C 71.72, H 5.19, N 16.70.

*2-[4-[(E)-(4-Nitrophenyl)diazenyl]phenyl]ethanol (3f)*

Red solid; 42% yield; m.p. 122.4-124.6°C; IR (KBr): 3550 (OH), 1596 (N=N) 1508 (NO), 1335 (NO) cm<sup>-1</sup>; <sup>1</sup>H-NMR (CDCl<sub>3</sub>) δ 2.98 (t, 2H, J=6.6 Hz, CH<sub>2</sub>CH<sub>2</sub>OH), 3.94 (q, 2H, J=6.6 Hz, CH<sub>2</sub>CH<sub>2</sub>OH), 7.42 (d, 2H, J=8.2 Hz, CHar), 7.93 (d, 2H, J=8.4 Hz, CHar), 8.01 (d, 2H, J=9 Hz, CHar), 8.37 (d, 2H, J=9 Hz, CHar); <sup>13</sup>C-NMR (CDCl<sub>3</sub>) δ 39.4 (CH<sub>2</sub>CH<sub>2</sub>OH), 63.6 (CH<sub>2</sub>CH<sub>2</sub>OH), 100.4, 123.6, 123.9, 125.0 (CHar), 130.2, 132.8, 144.0, 151.4 (Car). Anal. calcd for C<sub>14</sub>H<sub>13</sub>N<sub>3</sub>O<sub>3</sub>: C 61.99, H 4.83, N 15.49. Found C 61.97, H 4.85, N 15.50.

*Procedure for the preparation of ethyl 2-[4-(2-hydroxyethyl)phenoxy]-2-methylpropanoate (7)*

Ethyl 2-bromo-2-methylpropanoate (**6**) (22.3 mmol, 3.3 mL) was added to a solution of 4-(2-hydroxyethyl)phenol (**4**) (7.2 mmol, 0.99 g) and dry K<sub>2</sub>CO<sub>3</sub> (72.0 mmol, 9.96 g) in DMF (3 mL/mmol, 21.7 mL). The mixture was stirred for 4h at reflux. Water (25 mL) was used to quench the reaction and ethyl acetate (3 × 50 mL) to extract the mixture. The organic layer was washed with brine, dried over Na<sub>2</sub>SO<sub>4</sub> and concentrated under reduced pressure. The crude product was purified by column chromatography on silica gel (eluent cyclohexane/ethyl acetate 8:2).

Yellow oil, 80% yield, IR (KBr) 3420 (OH), 1713 (C=O) cm<sup>-1</sup>; <sup>1</sup>H NMR (CDCl<sub>3</sub>) δ 1.28 (t, 3H, J = 7.2 Hz, CH<sub>2</sub>CH<sub>3</sub>), 1.57 (s, 6H, C(CH<sub>3</sub>)<sub>2</sub>), 2.91 (t, 2H, J = 7.8 Hz, OCH<sub>2</sub>CH<sub>2</sub>), 3.47 (t, 2H, J = 7.8 Hz, OCH<sub>2</sub>CH<sub>2</sub>), 4.34 (q, 2H, J = 7.2 Hz, CH<sub>2</sub>CH<sub>3</sub>), 6.84 (d, 2H, J = 8.5 Hz, CHar),

6.91 (d, 2H, J = 8.5 Hz, *CH*<sub>ar</sub>); <sup>13</sup>C NMR (CDCl<sub>3</sub>) δ 14.3 (CH<sub>3</sub>CH<sub>2</sub>), 24.9 (C(CH<sub>3</sub>)<sub>2</sub>), 39.0 (OCH<sub>2</sub>CH<sub>2</sub>), 61.1 (CH<sub>3</sub>CH<sub>2</sub>), 63.0 (OCH<sub>2</sub>CH<sub>2</sub>), 78.8 (C(CH<sub>3</sub>)<sub>2</sub>), 120.1, 128.5, (*CH*<sub>ar</sub>), 132.6, 154.0 (*Car*), 172.1 (C=O). Anal. calcd for C<sub>14</sub>H<sub>20</sub>O<sub>4</sub>: C 66.65, H 7.99. Found C 66.32, H 7.96.

*Procedure for the preparation of ethyl 2-(4-hydroxyphenoxy)-2-methylpropanoate (8)*

Hydroquinone (**5**) (0.2 g, 1.82 mmol) and ethyl 2-bromo isobutyrate (**6**) (0.13 mL, 0.91 mmol) were refluxed in ethanol (2 mL) with potassium hydroxide (0.5 g, 0.91 mmol) under nitrogen for 24 hours. A second portion of ethyl 2-bromo isobutyrate (0.13 mL) was added and the reflux was maintained for 48 hours. After ethanol removal, the residue was dissolved in ethyl acetate (15 mL), washed with water (15 mL) and brine (15 mL), dried over Na<sub>2</sub>SO<sub>4</sub> and evaporated to dryness. The residue was purified by column chromatography on silica gel (eluent cyclohexane/ethyl acetate 8:2) affording pure title compound.

Brown solid, 37% yield, m.p. 85-86 °C; IR (KBr) 3427 (OH), 1719 (C=O) cm<sup>-1</sup>; <sup>1</sup>H-NMR (CDCl<sub>3</sub>): δ 1.27 (t, 3H, J = 6.9 Hz, CH<sub>2</sub>CH<sub>3</sub>), 1.52 (s, 6H, C(CH<sub>3</sub>)<sub>2</sub>), 4.23 (q, 2H, J = 6.9 Hz, CH<sub>2</sub>CH<sub>3</sub>), 6.73 (d, 2H, J = 6.9 Hz, *CH*<sub>ar</sub>), 6.91 (d, 2H, J = 6.9 Hz, *CH*<sub>ar</sub>); <sup>13</sup>C-NMR (CDCl<sub>3</sub>): δ 14.3 (CH<sub>2</sub>CH<sub>3</sub>), 24.9 (C(CH<sub>3</sub>)<sub>2</sub>), 61.1 (CH<sub>2</sub>CH<sub>3</sub>), 78.8 (C(CH<sub>3</sub>)<sub>2</sub>), 120.1, 128.5 (*CH*<sub>ar</sub>), 132.6, 154.0 (*Car*), 172.1 (C=O). Anal. calcd for C<sub>12</sub>H<sub>16</sub>O<sub>4</sub>: C 64.27, H 7.19. Found C 64.25, H 7.22.

*General procedure for the preparation of esters 9a-g and 10a-f*

A solution of diisopropyl azodicarboxylate (DIAD) (18.14 mmol, 2.86 mL) in dry THF (10 mL) was added dropwise to a stirred solution of alcohols **3a-f** or **7** (13.30 mmol), triphenylphosphine (4.76 g, 18.14 mmol), and appropriate phenols **2a-g** or **8** (18.14 mmol) in dry THF (40 mL) under nitrogen atmosphere. After stirring for 10-12 h at room temperature,

the solvent was evaporated under reduced pressure. The obtained crude product was purified by column chromatography on silica gel (eluent cyclohexane/ethyl acetate 8:2) to afford esters **9a-g** and **10a-f**.

*Ethyl 2-methyl-2-[4-(2-[4-[(E)-phenyldiazenyl]phenoxy)ethyl]phenoxy]propanoate (9a)*

Characterization data are in agreement with those reported in the literature.<sup>1</sup>

*Ethyl 2-[4-(2-[4-[(E)-(4-chlorophenyl)diazenyl]phenoxy)ethyl]phenoxy]-2-methylpropanoate (9b)*

Orange oil; 58% yield; IR (KBr) 1734 (C=O), 1605 (N=N)  $\text{cm}^{-1}$ ;  $^1\text{H-NMR}$  ( $\text{CDCl}_3$ )  $\delta$  1.25 (t, 3H,  $J = 7.2$  Hz,  $\text{CH}_2\text{CH}_3$ ), 1.58 (s, 6H,  $\text{C}(\text{CH}_3)_2$ ), 3.06 (t, 2H,  $J = 6.6$  Hz,  $\text{OCH}_2\text{CH}_2$ ), 4.21 (t, 2H,  $J = 6.9$  Hz,  $\text{OCH}_2\text{CH}_2$ ), 4.25 (q, 2H,  $J = 7.2$ , Hz,  $\text{OCH}_2\text{CH}_3$ ), 6.81 (d, 2H,  $J = 9.3$  Hz,  $\text{CHar}$ ), 6.99 (d, 2H,  $J = 9.3$  Hz,  $\text{CHar}$ ), 7.16 (d, 2H,  $J = 8.4$  Hz,  $\text{CHar}$ ), 7.46 (d, 2H,  $J = 8.4$  Hz,  $\text{CHar}$ ), 7.82 (d, 2H,  $J = 9$  Hz,  $\text{CHar}$ ), 7.89 (d, 2H,  $J = 9$  Hz,  $\text{CHar}$ );  $^{13}\text{C-NMR}$  ( $\text{CDCl}_3$ )  $\delta$  14.3 ( $\text{CH}_2\text{CH}_3$ ), 25.0 ( $\text{C}(\text{CH}_3)_2$ ), 37.2 ( $\text{OCH}_2\text{CH}_2$ ), 61.1 ( $\text{CH}_2\text{CH}_3$ ), 68.8 ( $\text{OCH}_2\text{CH}_2$ ), 79.9 ( $\text{C}(\text{CH}_3)_2$ ), 115.2, 121.8, 123.3, 124.3, 129.5, 130.0 ( $\text{CHar}$ ), 137.0 ( $\text{CarCl}$ ), 142.9 ( $\text{CarCH}_2$ ), 149.3 ( $\text{CarN}$ ), 151.2 ( $\text{CarN}$ ), 151.4 ( $\text{CarOC}(\text{CH}_3)_2$ ), 154.5 ( $\text{CarOCH}_2\text{CH}_2$ ), 174.6 ( $\text{COOEt}$ ).  
Anal. calcd for  $\text{C}_{26}\text{H}_{27}\text{ClN}_2\text{O}_4$ : C 66.88, H 5.83, N 6.00. Found C 66.90, H 5.85, N 6.02.

*Ethyl 2-[4-(2-[4-[(E)-(4-bromophenyl)diazenyl]phenoxy)ethyl]phenoxy]-2-methylpropanoate (9c)*

Orange oil; 32% yield; IR (KBr) 1738 (C=O), 1615 (N=N)  $\text{cm}^{-1}$ ;  $^1\text{H-NMR}$  ( $\text{CDCl}_3$ )  $\delta$  1.27 (t, 3H,  $J = 7.2$  Hz,  $\text{CH}_2\text{CH}_3$ ), 1.52 (s, 6H,  $\text{C}(\text{CH}_3)_2$ ), 3.15 (t, 2H,  $J = 6.7$  Hz,  $\text{OCH}_2\text{CH}_2$ ), 4.18 (t, 2H,  $J = 6.9$  Hz,  $\text{OCH}_2\text{CH}_2$ ), 4.23 (q, 2H,  $J = 6.9$ , Hz,  $\text{OCH}_2\text{CH}_3$ ), 6.81 (d, 2H,  $J = 9.3$  Hz,  $\text{CHar}$ ), 6.90 (d, 2H,  $J = 9.3$  Hz,  $\text{CHar}$ ), 7.27 (d, 4H,  $J = 8.4$  Hz,  $\text{CHar}$ ), 7.64 (d, 2H,  $J = 8.4$  Hz,

*CHar*), 7.87 (d, 2H, *J* = 9 Hz, *CHar*); <sup>13</sup>C-NMR (CDCl<sub>3</sub>) δ 14.4 (CH<sub>2</sub>CH<sub>3</sub>), 25.5 (C(CH<sub>3</sub>)<sub>2</sub>), 36.0 (OCH<sub>2</sub>CH<sub>2</sub>), 61.6 (CH<sub>2</sub>CH<sub>3</sub>), 68.9 (OCH<sub>2</sub>CH<sub>2</sub>), 80.9 (C(CH<sub>3</sub>)<sub>2</sub>), 115.2, 121.8, 122.4, 123.3, 124.3 (*Car*), 125.5 (*CarBr*), 129.5, 130.0 (*Car*), 142.9 (*CarCH*<sub>2</sub>), 149.3 (*CarN*), 151.2 (*CarN*), 151.5 (*CarOC*(CH<sub>3</sub>)<sub>2</sub>), 154.5 (*CarOCH*<sub>2</sub>CH<sub>2</sub>), 174.6 (COOEt). Anal. calcd for C<sub>26</sub>H<sub>27</sub>BrN<sub>2</sub>O<sub>4</sub>: C 61.06, H 5.32, N 5.48. Found C 61.09, H 5.30, N 5.50.

*Ethyl*

*2-methyl-2-[4-[2-(4-{(E)-[4-*

*(trifluoromethyl)phenyl]diazanyl]phenoxy]ethyl]phenoxy}propanoate (9d)*

Strawberry oil; 46% yield; IR (KBr): 1736 (C=O), 1604 (N=N) cm<sup>-1</sup>; <sup>1</sup>H-NMR (CDCl<sub>3</sub>) δ 1.25 (t, 3H, *J*=7.2 Hz, CH<sub>2</sub>CH<sub>3</sub>), 1.52 (s, 6H, C(CH<sub>3</sub>)<sub>2</sub>), 3.15 (t, 2H, *J*=6.6 Hz, OCH<sub>2</sub>CH<sub>2</sub>), 4.20 (t, 2H, *J*=6.6 Hz, OCH<sub>2</sub>CH<sub>2</sub>), 4.22 (q, 2H, *J* = 6.9, Hz, OCH<sub>2</sub>CH<sub>3</sub>), 6.80 (d, 2H, *J*=8.1 Hz, *CHar*), 7.44 (d, 2H, *J*=8.4 Hz, *CHar*), 7.77 (d, 4H, *J*=8.7 Hz, *CHar*), 7.90 (d, 2H, *J*=8.4 Hz, *CHar*), 7.98 (d, 2H, *J*=8.4 Hz, *CHar*); <sup>13</sup>C-NMR (CDCl<sub>3</sub>) δ 14.4 (OCH<sub>2</sub>CH<sub>3</sub>), 25.5 (C(CH<sub>3</sub>)<sub>2</sub>), 35.0 (OCH<sub>2</sub>CH<sub>2</sub>), 61.6 (OCH<sub>2</sub>CH<sub>3</sub>), 68.7 (OCH<sub>2</sub>CH<sub>2</sub>), 79.9 (C(CH<sub>3</sub>)<sub>2</sub>), 114.0, 115.1, 118.8, 120.8, 121.8 (*CHar*), 123.7-123.5 (*Car-CF*<sub>3</sub>), 130.15 (*CHar*), 133.4, 143.6, 149.3, 151.4, 154.8 (*Car*), 174.5 (COOEt). Anal. calcd for C<sub>27</sub>H<sub>27</sub>F<sub>3</sub>N<sub>2</sub>O<sub>4</sub>: C 67.79, H 5.44, N 5.60. Found C 67.81, H 5.45, N 5.58.

*Ethyl 2-[4-(2-[4-{(E)-(4-cyanophenyl)diazanyl]phenoxy}ethyl]phenoxy]-2-methylpropanoate (9e)*

Orange solid; 41% yield; m.p. 87.5-89.3 °C; IR (KBr): 2250 (CN), 1736 (C=O), 1601 (N=N) cm<sup>-1</sup>; <sup>1</sup>H-NMR (CDCl<sub>3</sub>) δ 1.25 (t, 3H, CH<sub>2</sub>CH<sub>3</sub>), 1.55 (s, 6H, C(CH<sub>3</sub>)<sub>2</sub>), 3.07 (t, 2H, OCH<sub>2</sub>CH<sub>2</sub>), 4.20-4.27 (m, 4H, OCH<sub>2</sub>CH<sub>3</sub>; OCH<sub>2</sub>CH<sub>2</sub>), 6.79 (d, 2H, *J*=8.4 Hz, *CHar*), 7.01 (d, 2H, *J*=7.8 Hz, *CHar*), 7.16 (d, 2H, *J*=7.5 Hz, *CHar*), 7.59 (d, 2H, *J*=7.8 Hz, *CHar*), 7.79 (d, 2H, *J*=8.4 Hz, *CHar*), 7.93 (d, 2H, *J*=7.5 Hz, *CHar*); <sup>13</sup>C-NMR (CDCl<sub>3</sub>) δ 14.3 (CH<sub>2</sub>CH<sub>3</sub>),

25.6 (C(CH<sub>3</sub>)<sub>2</sub>), 35.0 (OCH<sub>2</sub>CH<sub>2</sub>), 61.7 (OCH<sub>2</sub>CH<sub>3</sub>), 69.4 (OCH<sub>2</sub>CH<sub>2</sub>), 79.3 (C(CH<sub>3</sub>)<sub>2</sub>), 115.2, 119.5, 123.3, 125.7, 129.9 (CHar), 131.5 (Car-CN), 133.4 (CHar), 133.5 (Car-CH<sub>2</sub>CH<sub>2</sub>O), 147.0 (Car-N=N), 154.4 (Car-N=N), 155.0 (Car-O-C), 162.6 (Car-OCH<sub>2</sub>CH<sub>2</sub>), 174.6 (COOEt). Anal. calcd for C<sub>27</sub>H<sub>27</sub>N<sub>3</sub>O<sub>4</sub>: C 70.88, H 5.95, N 9.18. Found C 70.90, H 5.93, N 9.20.

*Ethyl 2-methyl-2-[4-(2-[4-[(E)-(4-nitrophenyl)diazenyl]phenoxy]ethyl)phenoxy]propanoate (9f)*

Red solid; 23% yield; m.p. 114.0-114.8 °C; IR (KBr): 1727 (C=O), 1601 (N=N) cm<sup>-1</sup>; <sup>1</sup>H-NMR (CDCl<sub>3</sub>) δ 1.25 (t, 3H, J=6.9 Hz, CH<sub>2</sub>CH<sub>3</sub>), 1.59 (s, 6H, C(CH<sub>3</sub>)<sub>2</sub>), 3.07 (t, 2H, J=6.9 Hz, OCH<sub>2</sub>CH<sub>2</sub>), 4.24 (m, 4H, CH<sub>2</sub>CH<sub>3</sub>-OCH<sub>2</sub>CH<sub>2</sub>), 6.80 (d, 2H, J=8.4 Hz, CHar), 7.01 (d, 2H, J=8.7 Hz, CHar), 7.16 (d, 2H, J=8.7 Hz, CHar), 7.96 (t, 4H, J=8.7 Hz, CHar), 8.36 (d, 2H, J=9 Hz, CHar); <sup>13</sup>C-NMR (CDCl<sub>3</sub>) δ 14.3 (OCH<sub>2</sub>CH<sub>3</sub>), 25.6 (C(CH<sub>3</sub>)<sub>2</sub>), 35.0 (OCH<sub>2</sub>CH<sub>2</sub>), 61.7 (OCH<sub>2</sub>CH<sub>3</sub>), 69.4 (OCH<sub>2</sub>CH<sub>2</sub>), 79.3 (C(CH<sub>3</sub>)<sub>2</sub>), 115.2, 119.5, 123.3, 125.0, 125.8 (Car-NO<sub>2</sub>), 129.9, 131.5, 147.1 (Car), 148.4 (CHar), 154.4 (Car), 156.2 (CHar), 174.6 (COOEt). Anal. calcd for C<sub>26</sub>H<sub>27</sub>N<sub>3</sub>O<sub>6</sub>: C 65.40, H 5.70, N 8.80. Found C 65.43, H 5.67, N 8.82.

*Ethyl 2-[4-(2-[4-[(E)-(4-methoxyphenyl)diazenyl]phenoxy]ethyl)phenoxy]-2-methylpropanoate (9g)*

Orange solid; 37% yield; m.p. 50.8-51.7 °C; IR (KBr): 1731 (C=O), 1595 (N=N) cm<sup>-1</sup>; <sup>1</sup>H-NMR (CDCl<sub>3</sub>) δ 1.24 (t, 3H, J=7.2 Hz, CH<sub>2</sub>CH<sub>3</sub>), 1.58 (s, 6H, C(CH<sub>3</sub>)<sub>2</sub>), 3.06 (t, 2H, J=6.9, OCH<sub>2</sub>CH<sub>2</sub>), 3.86 (s, 3H, OCH<sub>3</sub>), 4.17-4.27 (m, 4H, J=7.2 Hz, J=6.9 Hz, CH<sub>2</sub>CH<sub>3</sub>-OCH<sub>2</sub>CH<sub>2</sub>), 6.80 (d, 2H, J=8.5, CHar), 6.97 (d, 2H, J=4.9 Hz, CHar), 7.00 (d, 2H, J=4.9 Hz, CHar), 7.16 (t, 2H, J=8.5 Hz, CHar), 7.84 (d, 2H, J=5.2 Hz, CHar), 7.87 (d, 2H, J=5.2 Hz, CHar); <sup>13</sup>C-NMR (CDCl<sub>3</sub>) δ 14.3 (OCH<sub>2</sub>CH<sub>3</sub>), 25.6 (C(CH<sub>3</sub>)<sub>2</sub>), 35.1 (OCH<sub>2</sub>CH<sub>2</sub>), 55.8

(OCH<sub>3</sub>), 61.7 (OCH<sub>2</sub>CH<sub>3</sub>), 69.3 (OCH<sub>2</sub>CH<sub>2</sub>), 79.3 (C(CH<sub>3</sub>)<sub>2</sub>), 114.4, 114.9, 119.5, 124.6, 129.9 (CHar), 131.8, 147.3, 154.3, 161.0, 161.8 (Car) 174.6 (COOEt). Anal. calcd for C<sub>27</sub>H<sub>30</sub>N<sub>2</sub>O<sub>5</sub>: C 70.11, H 6.54, N 6.06. Found C 70.13, H 6.55, N 6.03.

*Ethyl 2-methyl-2-[4-(2-[4-[(E)-phenyldiazenyl]phenyl]ethoxy)phenoxy]propanoate (10a)*

Orange oil; 73% yield; IR (KBr) 1733 (C=O), 1603 (N=N) cm<sup>-1</sup>; <sup>1</sup>H-NMR (CDCl<sub>3</sub>) δ 1.27 (t, J = 3H, 7.2 Hz, OCH<sub>2</sub>CH<sub>3</sub>), 1.53 (s, 6H, C(CH<sub>3</sub>)<sub>2</sub>), 3.15 (t, 2H, J = 6.9 Hz, OCH<sub>2</sub>CH<sub>2</sub>), 4.16 (t, 2H, J = 6.9 Hz, OCH<sub>2</sub>CH<sub>2</sub>), 4.21 (q, 2H, J = 7.2, Hz, OCH<sub>2</sub>CH<sub>3</sub>), 6.75-6.85 (m, 3H, CHar), 6.90 (d, 1H, J = 9.3 Hz, CHar), 7.42 (d, 1H, J = 9.3 Hz, CHar), 7.47-7.55 (m, 4H, CHar), 7.86-7.92 (m, 4H, CHar); <sup>13</sup>C-NMR (CDCl<sub>3</sub>) δ 14.4 (OCH<sub>2</sub>CH<sub>3</sub>), 25.5 (C(CH<sub>3</sub>)<sub>2</sub>), 36.0 (OCH<sub>2</sub>CH<sub>2</sub>), 61.6 (OCH<sub>2</sub>CH<sub>3</sub>), 68.9 (OCH<sub>2</sub>CH<sub>2</sub>), 80.0 (C(CH<sub>3</sub>)<sub>2</sub>), 115.2, 121.8, 123.0, 123.3, 129.3, 130.0, 131.1 (CHar), 142.0 (CarCH<sub>2</sub>), 149.3 (CarN), 151.6 (CarN), 151.9 (CarOC(CH<sub>3</sub>)<sub>2</sub>), 154.5 (CarOCH<sub>2</sub>CH<sub>2</sub>), 174.6 (COOEt). Anal. calcd for C<sub>26</sub>H<sub>28</sub> N<sub>2</sub>O<sub>4</sub>: C 72.20, H 6.53, N 6.48. Found C 72.18, H 6.55, N 6.47.

*Ethyl 2-[4-(2-[4-[(E)-(4-chlorophenyl)diazenyl]phenyl]ethoxy)phenoxy]-2-methylpropanoate (10b)*

Orange solid; 72% yield; m.p. 150.6-152.8 °C; IR (KBr): 1735 (C=O), 1605 (N=N) cm<sup>-1</sup>; <sup>1</sup>H-NMR (CDCl<sub>3</sub>) δ 1.27 (t, J = 3H, 7.2 Hz, OCH<sub>2</sub>CH<sub>3</sub>), 1.56 (s, 6H, C(CH<sub>3</sub>)<sub>2</sub>), 3.15 (t, 2H, J = 6.9 Hz, OCH<sub>2</sub>CH<sub>2</sub>), 4.16 (t, 2H, J = 6.9 Hz, OCH<sub>2</sub>CH<sub>2</sub>), 4.22 (q, 2H, J = 7.3 Hz, OCH<sub>2</sub>CH<sub>3</sub>), 6.81 (d, 2H, J = 9 Hz, CHar), 6.91 (d, 2H, J = 9 Hz, CHar), 7.43 (d, 2H, J = 8.4 Hz, CHar), 7.48 (d, 2H, J = 8.4 Hz, CHar), 7.85 (d, 2H, J = 2.1 Hz, CHar), 7.87 (d, 2H, J = 2.1 Hz, CHar); <sup>13</sup>C-NMR (CDCl<sub>3</sub>) δ 14.3 (OCH<sub>2</sub>CH<sub>3</sub>), 24.9 (C(CH<sub>3</sub>)<sub>2</sub>), 37.3 (OCH<sub>2</sub>CH<sub>2</sub>), 61.1 (OCH<sub>2</sub>CH<sub>3</sub>), 70.0 (OCH<sub>2</sub>CH<sub>2</sub>), 78.7 (C(CH<sub>3</sub>)<sub>2</sub>), 114.9, 122.9, 124.9, 126.0, 129.6, 132.6 (CHar), 133.1 (Car),

145.9 (CarCl), 146.9, 152.0, 153.9, 166.2 (Car), 170.5 (COOEt). Anal. calcd for C<sub>26</sub>H<sub>27</sub>ClN<sub>2</sub>O<sub>4</sub>: C 66.88, H 5.83, N 6.00. Found C 66.87, H 5.85, N 6.02.

*Ethyl 2-[4-(2-[4-[(E)-(4-bromophenyl)diazenyl]phenyl]ethoxy)phenoxy]-2-methylpropanoate (10c)*

Orange oil; 32% yield; IR (KBr): 1732 (C=O), 1602 (N=N) cm<sup>-1</sup>; <sup>1</sup>H-NMR (CDCl<sub>3</sub>) δ 1.27 (t, 3H, J= 7.2 Hz, OCH<sub>2</sub>CH<sub>3</sub>), 1.52 (s, 6H, C(CH<sub>3</sub>)<sub>2</sub>), 3.15 (t, 2H, J = 6.7 Hz, OCH<sub>2</sub>CH<sub>2</sub>), 4.18 (t, 2H, J = 6.7 Hz, OCH<sub>2</sub>CH<sub>2</sub>), 4.23 (q, 2H, J = 7.2, Hz, OCH<sub>2</sub>CH<sub>3</sub>), 6.81 (d, 2H, J = 9.3 Hz, CHar), 6.90 (d, 2H, J = 9.3 Hz, CHar), 7.27 (d, 4H, J = 8.4 Hz, CHar), 7.64 (d, 2H, J = 8.4 Hz, CHar), 7.87 (d, 2H, J = 8.4 Hz, CHar); <sup>13</sup>C-NMR (CDCl<sub>3</sub>) δ 14.4 (OCH<sub>2</sub>CH<sub>3</sub>), 25.5 (C(CH<sub>3</sub>)<sub>2</sub>), 35.9 (OCH<sub>2</sub>CH<sub>2</sub>), 61.6 (OCH<sub>2</sub>CH<sub>3</sub>), 68.8 (OCH<sub>2</sub>CH<sub>2</sub>), 80.9 (C(CH<sub>3</sub>)<sub>2</sub>), 115.2, 121.8, 122.4, 123.3, 124.30(Car), 125.5 (CarBr), 129.5, 130.0 (Car), 142.9 (CarCH<sub>2</sub>), 149.3, 151.2 (CarN), 151.5 (CarOC(CH<sub>3</sub>)<sub>2</sub>), 154.5 (CarOCH<sub>2</sub>CH<sub>2</sub>), 174.6 (COOEt). Anal. calcd for C<sub>26</sub>H<sub>27</sub>BrN<sub>2</sub>O<sub>4</sub>: C 61.06, H 5.32, N 5.48. Found C 61.04, H 5.30, N 5.49.

*Ethyl* *2-methyl-2-[4-[2-(4-[(E)-[4-(trifluoromethyl)phenyl]diazenyl]phenyl]ethoxy]phenoxy]propanoate (10d)*

Strawberry oil; 46% yield; IR (KBr): 1736 (C=O), 1601 (N=N) cm<sup>-1</sup>; <sup>1</sup>H-NMR (CDCl<sub>3</sub>) δ 1.27 (t, 3H, J=7.2 Hz, CH<sub>2</sub>CH<sub>3</sub>), 1.53 (s, 6H, C(CH<sub>3</sub>)<sub>2</sub>), 3.16 (t, 2H, J=6.6 Hz, OCH<sub>2</sub>CH<sub>2</sub>), 4.18 (q, 4H, J=6.6 Hz, OCH<sub>2</sub>CH<sub>2</sub>), 4.23 (q, 2H, J = 7.2 Hz, CH<sub>2</sub>CH<sub>3</sub>), 6.80 (d, 2H, J=8.1 Hz, CHar), 7.45 (d, 2H, J=8.4 Hz, CHar), 7.77 (d, 2H, J=8.7 Hz, CHar), 7.90 (d, 2H, J=8.4 Hz, CHar), 7.98 (d, 2H, J=8.4 Hz, CHar); <sup>13</sup>C-NMR (CDCl<sub>3</sub>) δ 14.4 (OCH<sub>2</sub>CH<sub>3</sub>), 25.5 (C(CH<sub>3</sub>)<sub>2</sub>), 36.0 (OCH<sub>2</sub>CH<sub>2</sub>), 61.6 (OCH<sub>2</sub>CH<sub>3</sub>), 68.7 (OCH<sub>2</sub>CH<sub>2</sub>), 79.9 (C(CH<sub>3</sub>)<sub>2</sub>), 14.0, 115.1, 118.8, 120.8 (CF<sub>3</sub>), 116.2, 121.8, 123.5, 123.7, 130.2, 133.4 (CHar), 121.3, 129.7, 133.3, (Car-CF<sub>3</sub>),

143.6, 149.3, 151.4, 154.5, 154.8 (Car), 174.5 (COOEt). Anal. calcd for C<sub>27</sub>H<sub>27</sub>F<sub>3</sub>N<sub>2</sub>O<sub>4</sub>: C 64.79, H 5.44, N 5.60. Found C 64.80, H 5.42, N 5.61.

*Ethyl 2-[4-(2-{4-[(E)-(4-cyanophenyl)diazenyl]phenyl}ethoxy)phenoxy]-2-methylpropanoate (10e)*

Red wax; 68% yield; m.p. 77.2-77.8 °C; IR (KBr): 2226 (CN), 1734 (C=O), 1603 (N=N) cm<sup>-1</sup>; <sup>1</sup>H-NMR (CDCl<sub>3</sub>) δ 1.27 (t, 3H, J= 7.2 Hz, OCH<sub>2</sub>CH<sub>3</sub>) 1.52 (s, 6H, C(CH<sub>3</sub>)<sub>2</sub>), 3.16 (t, 2H, J = 6.6 Hz, OCH<sub>2</sub>CH<sub>2</sub>), 4.17 (t, 2H, J = 6.6 Hz, OCH<sub>2</sub>CH<sub>2</sub>), 4.23 (q, 2H, J = 7.2, Hz, OCH<sub>2</sub>CH<sub>3</sub>), 6.77 (d, 2H, J = 9.3 Hz, CH<sub>ar</sub>), 6.83 (d, 2H, J = 9.3 Hz, CH<sub>ar</sub>), 7.45 (d, 2H, J = 8.4 Hz, CH<sub>ar</sub>), 7.80 (d, 2H, J = 9 Hz, CH<sub>ar</sub>), 7.90 (d, 2H, J = 8.4 Hz, CH<sub>ar</sub>), 7.97 (d, J = 9, 2H, CH<sub>ar</sub>); <sup>13</sup>C-NMR (CDCl<sub>3</sub>) δ 14.4 (OCH<sub>2</sub>CH<sub>3</sub>), 25.5 (C(CH<sub>3</sub>)<sub>2</sub>), 36.0 (CarCH<sub>2</sub>), 61.6 (OCH<sub>2</sub>CH<sub>3</sub>), 68.7 (CH<sub>2</sub>CH<sub>2</sub>O), 79.9 (C(CH<sub>3</sub>)<sub>2</sub>), 113.9 (CarCN), 115.1 (Car), 118.8 (CN), 121.8, 123.5, 123.7, 130.2, 133.4 (Car), 143.6 (CarCH<sub>2</sub>), 149.4, 151.4 (CarN), 154.5 (CarOC(CH<sub>3</sub>)<sub>2</sub>), 154.8 (CarOCH<sub>2</sub>CH<sub>2</sub>), 174.5 (COOEt). Anal. calcd for C<sub>27</sub>H<sub>27</sub>N<sub>3</sub>O<sub>4</sub>: C 70.88, H 5.95, N 9.18. Found C 70.90, H 5.93, N 9.17.

*Ethyl 2-methyl-2-[4-(2-{4-[(E)-(4-nitrophenyl)diazenyl]phenyl}ethoxy)phenoxy]propanoate (10f)*

Strawberry solid; 33% yield; m.p. 109-110.5 °C; IR (KBr): 1735 (C=O), 1605 (N=N), 1505 (NO), 1341 (NO) cm<sup>-1</sup>; <sup>1</sup>H-NMR (CDCl<sub>3</sub>) δ 1.27 (t, 3H, J=6.3 Hz, CH<sub>2</sub>CH<sub>3</sub>), 1.52 (s, 6H, C(CH<sub>3</sub>)<sub>2</sub>), 3.16 (t, 2H, J=6.9 Hz, OCH<sub>2</sub>CH<sub>2</sub>), 4.21 (q, 4H, J=6.3 Hz, CH<sub>2</sub>CH<sub>3</sub>-OCH<sub>2</sub>CH<sub>2</sub>), 6.80 (q, 4H, J=8.1 Hz, CH<sub>ar</sub>), 7.46 (d, 2H, J=8.4 Hz, CH<sub>ar</sub>), 7.92 (d, 2H, J=8.1 Hz, CH<sub>ar</sub>), 8.01 (d, 2H, J=8.1 Hz, CH<sub>ar</sub>), 8.37 (d, 2H, J=8.4 Hz, CH<sub>ar</sub>); <sup>13</sup>C-NMR (CDCl<sub>3</sub>) δ 14.4 (OCH<sub>2</sub>CH<sub>3</sub>), 25.5 (C(CH<sub>3</sub>)<sub>2</sub>), 36.0 (OCH<sub>2</sub>CH<sub>2</sub>), 61.6 (OCH<sub>2</sub>CH<sub>3</sub>), 68.7 (OCH<sub>2</sub>CH<sub>2</sub>), 79.9 (C(CH<sub>3</sub>)<sub>2</sub>), 115.1 (CH<sub>ar</sub>), 121.2 (CH<sub>ar</sub>), 123.8 (CH<sub>ar</sub>), 124.9 (CH<sub>ar</sub>), 130.2 (CH<sub>ar</sub>), 143.9



(Car), 148.8 (Car), 149.3 (Car), 154.4(Car), 156.0 (Car), 174.6 (COOEt). Anal. calcd for  $C_{26}H_{27}N_3O_6$ : C 65.40, H 5.70, N 8.80. Found C 65.43, H 5.72, N 8.79.

*General procedure for the preparation of acids 11a-g and 12a-f*

To esters **9a-g** or **10a-f** (3.0 mmol) in EtOH (20 mL), a solution of 1N NaOH (3.9 mmol) was added and the mixture was stirred at r.t. for 15-24 h. After solvent removal, the residue was poured into water (20 mL) and acidified with conc HCl at 0 °C. The aqueous layer was extracted with dichloromethane (3 × 20 mL) and the organic layer was dried over  $Na_2SO_4$  and concentrated under reduced pressure. The crude of the reaction was purified by crystallization or by column chromatography on silica gel (eluent cyclohexane/ethyl acetate 1:1 or dichloromethane/methanol 9:1) giving acids **11a-g** or **12a-f** in good yields.

*2-Methyl-2-[4-(2-{4-[(E)-phenyldiazenyl]phenoxy}ethyl)phenoxy]propanoic acid (11a)*

Characterization data are in agreement with those reported in the literature.<sup>1</sup>

*2-[4-(2-{4-[(E)-(4-Chlorophenyl)diazenyl]phenoxy}ethyl)phenoxy]-2-methylpropanoic acid (11b)*

Orange solid; 91% yield; m.p. 143.4-145.7 °C; IR (KBr): 3238 (OH), 1719 (C=O), 1603 (N=N)  $cm^{-1}$ ;  $^1H$ -NMR ( $CDCl_3$ )  $\delta$  1.59 (s, 6H,  $C(CH_3)_2$ ), 3.09 (t, 2H,  $J=6.9$  Hz,  $OCH_2CH_2$ ), 4.23 (t, 2H,  $J=6.9$  Hz,  $OCH_2CH_2$ ), 6.91 (d, 2H,  $J=8.4$  Hz,  $CHar$ ), 6.99 (d, 2H,  $J=9$  Hz,  $CHar$ ), 7.22 (d, 2H,  $J=8.4$  Hz,  $CHar$ ), 7.46 (d, 2H,  $J=8.7$  Hz,  $CHar$ ), 7.82 (d, 2H,  $J=9$  Hz,  $CHar$ ), 7.88 (d, 2H,  $J=8.7$  Hz,  $CHar$ );  $^{13}C$ -NMR ( $CDCl_3$ )  $\delta$  25.2 ( $C(CH_3)_2$ ), 35.1 ( $OCH_2CH_2$ ), 69.2 ( $OCH_2CH_2$ ), 80.0 ( $C(CH_3)_2$ ), 115.0, 121.1, 124.0, 125.1, 129.5 ( $CHar$ ), 130.1 (CarCl), 133.2 (Car $CH_2CH_2O$ ), 136.4 ( $CHar$ ), 147.0 (CarN=N), 151.3 (CarN=N), 153.1 (CarOC), 161.7 (Car $OCH_2CH_2$ ), 177.5 (COOH). Anal. calcd for  $C_{24}H_{23}ClN_2O_4$ : C 65.68, H 5.28, N 6.38. Found C 65.70, H 5.25, N 6.39.

*2-[4-(2-{4-[(E)-(4-Bromophenyl)diazenyl]phenoxy}ethyl)phenoxy]-2-methylpropanoic acid (11c)*

Yellow solid; 44% yield; m.p. 159.7-160.6 °C; IR (KBr): 3434 (OH), 1712 (C=O), 1602 (N=N)  $\text{cm}^{-1}$ ;  $^1\text{H-NMR}$  ( $\text{CD}_3\text{OD}$ )  $\delta$  1.53 (s, 6H,  $\text{C}(\text{CH}_3)_2$ ), 3.05 (t, 2H,  $J=6.9$  Hz,  $\text{OCH}_2\text{CH}_2$ ), 4.25 (t, 2H,  $J=6.9$  Hz,  $\text{OCH}_2\text{CH}_2$ ), 6.85 (d, 2H,  $J=8.1$  Hz,  $\text{CHar}$ ), 7.05 (d, 2H,  $J=9.0$  Hz,  $\text{CHar}$ ), 7.22 (d, 2H,  $J=8.1$  Hz,  $\text{CHar}$ ), 7.67 (d, 2H,  $J=7.8$  Hz,  $\text{CHar}$ ), 7.77 (d, 2H,  $J=7.8$  Hz,  $\text{CHar}$ ), 7.88 (d, 2H,  $J=9.0$  Hz,  $\text{CHar}$ );  $^{13}\text{C-NMR}$  ( $\text{CDCl}_3$ )  $\delta$  25.1 ( $\text{C}(\text{CH}_3)_2$ ), 35.2 ( $\text{OCH}_2\text{CH}_2$ ), 69.1 ( $\text{OCH}_2\text{CH}_2$ ), 83.8 ( $\text{C}(\text{CH}_3)_2$ ), 115.0, 121.5, 124.3, 125.1, 130.2 ( $\text{CHar}$ ), 130.6 ( $\text{CarBr}$ ), 132.5 ( $\text{CHar}$ ), 133.8 ( $\text{CarCH}_2\text{CH}_2\text{O}$ ), 147.1, 152.9 ( $\text{CarN=N}$ ), 161.7 ( $\text{CarOC}$ ), 170.0 ( $\text{CarOCH}_2\text{CH}_2$ ), 174.9 ( $\text{COOH}$ ). Anal. calcd for  $\text{C}_{24}\text{H}_{23}\text{BrN}_2\text{O}_4$ : C 59.64, H 4.80, N 5.80. Found C 59.66, H 4.82, N 5.77.

*2-Methyl-2-{4-[2-(4-{(E)-[4-(trifluoromethyl)phenyl]diazenyl]phenoxy}ethyl)phenoxy]propanoic acid (11d)*

Orange solid; 50% yield; m.p. 103.6-106.5°C; IR (KBr): 3233 (OH), 1718 (C=O), 1606 (N=N)  $\text{cm}^{-1}$ ;  $^1\text{H-NMR}$  ( $\text{CDCl}_3$ )  $\delta$  1.58 (s, 6H,  $\text{C}(\text{CH}_3)_2$ ), 3.10 (t, 2H,  $J=6.9$  Hz,  $\text{OCH}_2\text{CH}_2$ ), 4.24 (t, 2H,  $J=6.9$  Hz,  $\text{OCH}_2\text{CH}_2$ ), 6.91 (d, 2H,  $J=8.4$  Hz,  $\text{CHar}$ ), 7.01 (d, 2H,  $J=8.4$  Hz,  $\text{CHar}$ ), 7.23 (t, 2H,  $J=8.4$  Hz,  $\text{CHar}$ ), 7.74 (d, 2H,  $J=8.7$  Hz,  $\text{CHar}$ ), 7.93 (m, 4H,  $J_1=8.4$  Hz,  $J_2=8.7$  Hz,  $\text{CHar}$ );  $^{13}\text{C-NMR}$  ( $\text{CDCl}_3$ )  $\delta$  25.2 ( $\text{C}(\text{CH}_3)_2$ ), 35.1 ( $\text{OCH}_2\text{CH}_2$ ), 69.2 ( $\text{OCH}_2\text{CH}_2$ ), 80.2 ( $\text{C}(\text{CH}_3)_2$ ), 114.6, 120.0, 124.4, 133.4 ( $\text{CF}_3$ ), 115.1, 121.3, 122.9, 125.4, 126.5, 130.2 ( $\text{CHar}$ ), 147.0, 152.9, 154.8, 162.1 ( $\text{Car}$ ), 175.2 ( $\text{COOH}$ ). Anal. calcd for  $\text{C}_{25}\text{H}_{23}\text{F}_3\text{N}_2\text{O}_4$ : C 63.55, H 4.91, N 5.93. Found C 63.53, H 4.90, N 5.95.

*2-[4-(2-{4-[(E)-(4-Cyanophenyl)diazenyl]phenoxy}ethyl)phenoxy]-2-methylpropanoic acid*  
**(11e)**

Orange solid; 43% yield; m.p. 130.2-132.8 °C; IR (KBr): 3142 (OH), 2227 (CN), 1715 (C=O), 1607 (N=N) cm<sup>-1</sup>; <sup>1</sup>H-NMR (CDCl<sub>3</sub>) δ 1.58 (s, 6H, C(CH<sub>3</sub>)<sub>2</sub>), 3.10 (t, 2H, J=6.6 Hz, OCH<sub>2</sub>CH<sub>2</sub>), 4.25 (t, 2H, J=6.6 Hz, OCH<sub>2</sub>CH<sub>2</sub>), 6.92 (d, 2H, J=8.1 Hz, CHar), 7.01 (d, 2H, J=8.7 Hz, CHar), 7.17 (d, 2H, J=8.4 Hz, CHar), 7.79 (d, 2H, J=8.4 Hz, CHar), 7.93 (dd, 4H, J=8.1 Hz, CHar); <sup>13</sup>C-NMR (CDCl<sub>3</sub>) δ 25.2 (C(CH<sub>3</sub>)<sub>2</sub>), 35.1 (OCH<sub>2</sub>CH<sub>2</sub>), 69.3 (OCH<sub>2</sub>CH<sub>2</sub>), 80.1 (C(CH<sub>3</sub>)<sub>2</sub>), 115.1 (CHar), 118.4 (CarCN), 121.1, 123.3, 125.7, 130.1 (CHar), 133.1 (CarCH<sub>2</sub>CH<sub>2</sub>O), 133.4 (CHar), 147.1, 153.2 (CarN=N), 160.6 (CarOC), 162.5 (CarOCH<sub>2</sub>CH<sub>2</sub>), 177.1 (COOH). Anal. calcd for C<sub>25</sub>H<sub>23</sub>N<sub>3</sub>O<sub>4</sub>: C 69.92, H 5.40, N 9.78. Found C 69.90, H 5.44, N 9.76.

*2-Methyl-2-[4-(2-{4-[(E)-(4-nitrophenyl)diazenyl]phenoxy}ethyl)phenoxy]propanoic acid*  
**(11f)**

Orange solid; 26% yield; m.p. 110.0-110.9 °C; IR (KBr): 3421 (OH), 1716 (C=O), 1602 (N=N) cm<sup>-1</sup>; <sup>1</sup>H-NMR (CDCl<sub>3</sub>) δ 1.59 (s, 6H, C(CH<sub>3</sub>)<sub>2</sub>), 3.09 (t, 2H, J=6.9 Hz, OCH<sub>2</sub>CH<sub>2</sub>), 4.24 (t, 2H, J=6.9 Hz, OCH<sub>2</sub>CH<sub>2</sub>), 6.91 (d, 2H, J=8.1 Hz, CHar), 7.01 (d, 2H, J=8.7 Hz, CHar), 7.23 (t, 2H, J=8.1 Hz, CHar), 7.95 (t, 4H, J=8.1 Hz, CHar), 8.35 (d, 2H, J=8.7 Hz, CHar); <sup>13</sup>C-NMR (CDCl<sub>3</sub>) δ 25.2 (C(CH<sub>3</sub>)<sub>2</sub>), 29.9 (C(CH<sub>3</sub>)<sub>2</sub>), 35.1 (OCH<sub>2</sub>CH<sub>2</sub>), 69.3 (OCH<sub>2</sub>CH<sub>2</sub>), 115.2, 121.2, 123.3, 124.9, 125.8, 130.1 (CHar), 133.2, 147.1, 148.4, 153.1, 156.2, 162.7 (Car), 177.0 (COOH). Anal. calcd for C<sub>24</sub>H<sub>23</sub>N<sub>3</sub>O<sub>6</sub>: C 64.13, H 5.16, N 9.35. Found C 64.10, H 5.18, N 9.34.

*2-[4-(2-{4-[(E)-(4-Methoxyphenyl)diazenyl]phenoxy}ethyl)phenoxy]-2-methylpropanoic acid*  
**(11g)**

Yellow solid; 44% yield; m.p. 111.1-113.8 °C; IR (KBr): 3425 (OH), 1716 (C=O), 1597 (N=N)  $\text{cm}^{-1}$ ;  $^1\text{H-NMR}$  ( $\text{CDCl}_3$ )  $\delta$  1.59 (s, 6H,  $\text{C}(\text{CH}_3)_2$ ), 3.09 (t, 2H,  $J=6.9$  Hz,  $\text{OCH}_2\text{CH}_2$ ), 3.88 (s, 3H,  $\text{OCH}_3$ ), 4.22 (t, 2H,  $J=6.9$  Hz,  $\text{OCH}_2\text{CH}_2$ ), 6.91 (d, 2H,  $J=8.4$  Hz,  $\text{CHar}$ ), 6.95-7.01 (dd, 4H,  $J=7.2$  Hz,  $\text{CHar}$ ), 7.22 (d, 2H,  $J=8.4$  Hz,  $\text{CHar}$ ), 7.83-7.88 (dd, 4H,  $J=7.2$  Hz,  $\text{CHar}$ );  $^{13}\text{C-NMR}$  ( $\text{CDCl}_3$ )  $\delta$  25.1 ( $\text{C}(\text{CH}_3)_2$ ), 35.2 ( $\text{OCH}_2\text{CH}_2$ ), 55.8 ( $\text{OCH}_3$ ), 69.1 ( $\text{OCH}_2\text{CH}_2$ ), 80.4 ( $\text{C}(\text{CH}_3)_2$ ), 114.4, 114.9, 121.4, 124.6, 130.2 ( $\text{CHar}$ ), 133.7, 147.3, 160.9, 166.4, 171.0 ( $\text{Car}$ ), 181.6 ( $\text{COOH}$ ). Anal. calcd for  $\text{C}_{25}\text{H}_{26}\text{N}_2\text{O}_5$ : C 69.11, H 6.03, N 6.45. Found C 69.09, H 6.05, N 6.46.

*2-Methyl-2-[4-(2-{4-[(E)-phenyldiazenyl]phenyl}ethoxy)phenoxy]propanoic acid (12a)*

Orange solid; 97% yield; m.p. 112-127 °C; IR (KBr): 3462 (OH), 1709 (C=O), 1605 (N=N)  $\text{cm}^{-1}$ ;  $^1\text{H-NMR}$  ( $\text{CDCl}_3$ ):  $\delta$  1.52 (s, 6H,  $\text{C}(\text{CH}_3)_2$ ), 3.16 (t, 2H,  $J = 6.9$  Hz,  $\text{OCH}_2\text{CH}_2$ ), 4.19 (t, 2H,  $J = 6.9$  Hz,  $\text{OCH}_2\text{CH}_2$ ), 6.86-6.89 (m, 4H,  $\text{CHar}$ ), 7.42 (d, 1H,  $\text{CHar}$ ), 7.50 (d, 4H,  $J = 9.0$  Hz,  $\text{CHar}$ ), 7.89 (t, 4H,  $J = 9.0$  Hz,  $\text{CHar}$ );  $^{13}\text{C-NMR}$  ( $\text{CDCl}_3$ ):  $\delta$  24.8 ( $\text{C}(\text{CH}_3)_2$ ), 35.9 ( $\text{OCH}_2\text{CH}_2$ ), 68.9 ( $\text{OCH}_2\text{CH}_2$ ), 81.9 ( $\text{C}(\text{CH}_3)_2$ ), 116.0, 122.4, 122.6, 125.8, 128.6, 129.8, 130.6 ( $\text{CHar}$ ), 149.7, 1152.6, 143.1, 159.5, 151.5 ( $\text{Car}$ ), 175.2 ( $\text{COOH}$ ). Anal. calcd for  $\text{C}_{24}\text{H}_{24}\text{N}_2\text{O}_4$ : C 71.27, H 5.98, N 6.93. Found C 71.29, H 5.96, N 6.92.

*2-[4-(2-{4-[(E)-(4-Chlorophenyl)diazenyl]phenyl}ethoxy)phenoxy]-2-methylpropanoic acid (12b)*

Orange solid; 72% yield; m.p. 150.6-152.8 °C; IR (KBr): 3462 (OH), 1707 (C=O), 1606 (N=N)  $\text{cm}^{-1}$ ;  $^1\text{H-NMR}$  ( $\text{CDCl}_3$ ):  $\delta$  1.52 (s, 6H,  $\text{C}(\text{CH}_3)_2$ ), 3.16 (t, 2H,  $J = 6.9$  Hz,  $\text{OCH}_2\text{CH}_2$ ), 4.18 (t, 2H,  $J = 6.9$  Hz,  $\text{OCH}_2\text{CH}_2$ ), 6.81 (d, 2H,  $J = 9$  Hz,  $\text{CHar}$ ), 6.91 (d, 2H,  $J = 9$  Hz,  $\text{CHar}$ ), 7.43 (d, 2H,  $J = 8.7$  Hz,  $\text{CHar}$ ), 7.48 (d, 2H,  $J = 8.7$  Hz,  $\text{CHar}$ ), 7.85 (d, 2H,  $J = 2.1$  Hz,  $\text{CHar}$ ), 7.88 (d, 2H,  $J = 2.1$  Hz,  $\text{CHar}$ );  $^{13}\text{C-NMR}$  ( $\text{CDCl}_3$ ):  $\delta$  24.9 ( $\text{C}(\text{CH}_3)_2$ ), 35.9

(OCH<sub>2</sub>CH<sub>2</sub>), 68.9 (OCH<sub>2</sub>CH<sub>2</sub>), 80.9 (C(CH<sub>3</sub>)<sub>2</sub>), 115.3, 123.3, 123.5, 124.3, 129.5, 130.0 (CHar), 137.0 (Car), 142.2 (CCl), 147.2, 151.2, 151.5, 155.7 (Car), 175.7 (COOH). Anal. calcd for C<sub>24</sub>H<sub>23</sub>ClN<sub>2</sub>O<sub>4</sub>: C 65.68, H 5.28, N 6.38. Found C 65.67, H 5.30, N 6.36.

*2-[4-(2-{4-[(E)-(4-Bromophenyl)diazenyl]phenyl}ethoxy)phenoxy]-2-methylpropanoic acid (12c)*

Orange solid; 79 % yield; m.p. 167.3-189.9 °C; IR (KBr): 3445 (OH), 1704 (C=O), 1605 (N=N) cm<sup>-1</sup>; <sup>1</sup>H-NMR (CDCl<sub>3</sub>): δ 1.52 (s, 6H, C(CH<sub>3</sub>)<sub>2</sub>), 3.16 (t, 2H, J = 6.9 Hz, OCH<sub>2</sub>CH<sub>2</sub>), 4.18 (t, 2H, J = 6.9 Hz, OCH<sub>2</sub>CH<sub>2</sub>), 6.82 (d, 2H, J = 9 Hz, CHar), 6.9 (d, 2H, J = 9 Hz, CHar), 7.42 (d, 2H, J = 8.4 Hz, CHar), 7.64 (d, 2H, J = 8.4 Hz, CHar), 7.79 (d, 2H, J = 8.1, CHar), 7.87 (d, 2H, J = 8.1 Hz, CHar); <sup>13</sup>C-NMR (CDCl<sub>3</sub>): δ 24.9 (C(CH<sub>3</sub>)<sub>2</sub>), 35.9 (OCH<sub>2</sub>CH<sub>2</sub>), 68.8 (OCH<sub>2</sub>CH<sub>2</sub>), 80.9 (C(CH<sub>3</sub>)<sub>2</sub>), 121.1, 122.4, 123.5, 124.5, 125.5, 130.0 (CHar), 132.5 (CarBr), 142.3, 151.5, 151.6, 155.7, 155.9 (Car), 175.9 (COOH). Anal. calcd for C<sub>24</sub>H<sub>23</sub>BrN<sub>2</sub>O<sub>4</sub>: C 59.64, H 4.80, N 5.80. Found C 59.62, H 4.81, N 5.78.

*2-Methyl-2-[4-[2-(4-{(E)-[4-(trifluoromethyl)phenyl]diazenyl]phenyl}ethoxy)phenoxy]propanoic acid (12d)*

Orange solid; 23 % yield; m.p. 103.4-105.5 °C; IR (KBr): 3233 (OH), 1720 (C=O), 1610 (N=N) cm<sup>-1</sup>; <sup>1</sup>H-NMR (CD<sub>3</sub>OD): δ 1.48 (s, 6H, C(CH<sub>3</sub>)<sub>2</sub>), 3.30 (t, 2H, J = 6.6 Hz, OCH<sub>2</sub>CH<sub>2</sub>), 4.21 (t, 2H, J = 6.6 Hz, OCH<sub>2</sub>CH<sub>2</sub>), 6.66 (d, 2H, J = 9.3 Hz, CHar), 6.79 (d, 2H, J = 9.3 Hz, CHar), 7.51 (d, 2H, J = 8.4 Hz, CHar), 7.87 (d, 2H, J = 8.4 Hz, CHar), 7.91 (d, 2H, J = 9.3, CHar), 8.03 (d, 2H, J = 9.3 Hz, CHar); <sup>13</sup>C-NMR (CD<sub>3</sub>OD): δ 24.7 (C(CH<sub>3</sub>)<sub>2</sub>), 35.3 (OCH<sub>2</sub>CH<sub>2</sub>), 68.4 (OCH<sub>2</sub>CH<sub>2</sub>), 79.8 (C(CH<sub>3</sub>)<sub>2</sub>), 114.5, 121.0, 122.7, 122.8, 126.0, 129.7 (CHar), 126.1 (CF<sub>3</sub>), 143.7 (CCF<sub>3</sub>), 144.9, 147.6, 153.9, 154.6, 164.9 (Car), 175.2 (COOH). Anal. calcd for C<sub>25</sub>H<sub>23</sub>F<sub>3</sub>N<sub>2</sub>O<sub>4</sub>: C 63.55, H 4.91, N 5.93. Found C 63.58, H 4.89, N 5.95.

*2-[4-(2-{4-[(E)-(4-Cyanophenyl)diazenyl]phenyl}ethoxy)phenoxy]-2-methylpropanoic acid*  
(12e)

Orange solid; 62 % yield; m.p. 162-165 °C; IR (KBr): 3193 (OH), 2246 (CN), 1742 (C=O), 1606 (N=N) cm<sup>-1</sup>; <sup>1</sup>H-NMR (CDCl<sub>3</sub>): δ 1.52 (s, 6H, C(CH<sub>3</sub>)<sub>2</sub>), 3.18 (t, 2H, J = 6.6 Hz, OCH<sub>2</sub>CH<sub>2</sub>), 4.20 (t, 2H, J = 6.6 Hz, OCH<sub>2</sub>CH<sub>2</sub>), 6.82 (d, 2H, J = 9.3 Hz, CHar), 6.91 (d, 2H, J = 9.3 Hz, CHar), 7.46 (d, 2H, J = 8.7 Hz, CHar), 7.81 (d, 2H, J = 9 Hz, CHar), 7.91 (d, 2H, J = 8.7 Hz, CHar), 7.97 (d, 2H, J = 9 Hz, CHar); <sup>13</sup>C-NMR (CDCl<sub>3</sub>): δ 24.9 (C(CH<sub>3</sub>)<sub>2</sub>), 35.9 (OCH<sub>2</sub>CH<sub>2</sub>), 68.7 (OCH<sub>2</sub>CH<sub>2</sub>), 80.8 (C(CH<sub>3</sub>)<sub>2</sub>), 114.0 (CN), 115.3 (CHar), 118.8 (CarCN), 123.4, 123.5, 123.7, 130.2, 133.5 (CHar), 143.5, 147.5, 151.4, 154.8, 155.5 (Car), 176.3 (COOH). Anal. calcd for C<sub>25</sub>H<sub>23</sub>N<sub>3</sub>O<sub>4</sub>: C 69.92, H 5.40, N 9.78. Found C 69.93, H 5.43, N 9.76.

*2-Methyl-2-[4-(2-{4-[(E)-(4-nitrophenyl)diazenyl]phenyl}ethoxy)phenoxy]propanoic acid*  
(12f)

Red solid; 62 % yield; m.p. 148.8-150.3 °C; IR (KBr): 3463 (OH), 1709 (C=O), 1615 (N=N) cm<sup>-1</sup>; <sup>1</sup>H-NMR (CDCl<sub>3</sub>): δ 1.52 (s, 6H, C(CH<sub>3</sub>)<sub>2</sub>), 3.18 (t, 2H, J = 6.6 Hz, OCH<sub>2</sub>CH<sub>2</sub>), 4.20 (t, 2H, J = 6.6 Hz, OCH<sub>2</sub>CH<sub>2</sub>), 6.82 (d, 2H, J = 9.3 Hz, CHar), 6.9 (d, 2H, J = 9.3 Hz, CHar), 7.46 (d, 2H, J = 8.4 Hz, CHar), 7.9 (d, 2H, J = 8.4 Hz, CHar), 8.02 (d, 2H, J = 9.3, CHar), 8.4 (d, 2H, J = 9.3 Hz, CHar); <sup>13</sup>C-NMR (CDCl<sub>3</sub>): δ 25.0 (C(CH<sub>3</sub>)<sub>2</sub>), 36.0 (OCH<sub>2</sub>CH<sub>2</sub>), 68.7 (OCH<sub>2</sub>CH<sub>2</sub>), 80.8 (C(CH<sub>3</sub>)<sub>2</sub>), 115.3, 123.4, 123.6, 123.8, 125.0, 130.2 (CHar), 143.7, 147.5 (Car), 148.8 (CarNO<sub>2</sub>), 151.4, 155.5, 155.9 (Car), 175.2 (COOH). Anal. calcd for C<sub>24</sub>H<sub>23</sub>N<sub>3</sub>O<sub>6</sub>: C 64.13, H 5.16, N 9.35. Found C 64.15, H 5.13, N 9.33.

## **Biological Methods**

Reference compounds, the medium, and other cell culture reagents were purchased from Sigma-Aldrich (Milan, Italy) and Invitrogen (Carlsbad, CA).

### *Cell Culture and Transfections*

Human hepatoblastoma cell line HepG2 was cultured at 37° C and in a humidified atmosphere of 5% CO<sub>2</sub> in growth medium composed of Minimum Essential Medium (MEM) containing 10% of heat-inactivated FBS, 1% penicillin G/streptomycin, 1% MEM non-essential amino acid, and 1% Glutamine. For transactivation assays, 10<sup>5</sup> cells/well were seeded in a 24-well plate and cultured until confluency. Cells were transiently transfected with 30 ng of expression plasmids encoding the fusion protein GAL4-PPAR $\alpha$ -LBD, GAL4-PPAR $\gamma$ -LBD or GAL4-PPAR $\beta/\delta$ -LBD, 100 ng of reporter plasmid pGAL5TKpGL3, and 150 ng of control plasmid pCMV $\beta$ gal per well by CAPHOS®, a calcium-phosphate coprecipitation method, according to the manufacturer's guidelines. Four hours after transfection, medium was replaced with fresh serum-free medium supplemented with test compound (ranging from 100 nM to 100  $\mu$ M), reference compounds clofibric acid (100  $\mu$ M), rosiglitazone (2  $\mu$ M), and L165,041 (2  $\mu$ M), or DMSO 0.1%. After 20-22 h treatment, luciferase activity and  $\beta$ -galactosidase activity in cell extracts were determined by a Multilabel Plate Reader (VICTOR<sup>3</sup> V, PerkinElmer) as previously described.<sup>2</sup> Luciferase activity were normalized to  $\beta$ -galactosidase activity to correct the transfection efficiencies. All transfection experiments were performed in triplicate and repeated at least twice.

### *Cell culture, RNA extraction and gene expression analysis*

HepG2 cells were seeded in 6-well plates at a density of 5 × 10<sup>5</sup> cells/well in 2 mL of culture medium (DMEM with 10% FBS) per well and grown at 37 °C, 5% CO<sub>2</sub> for 24 h. Then, cells

were incubated for 48 h with a serum free medium containing the test compound **12a** (100  $\mu$ M, 0.25% DMSO). Treatments with the commercial compounds L165,041 (2  $\mu$ M, 0.1% DMSO), GW7647 (2  $\mu$ M, 0.02% DMSO) or rosiglitazone (10  $\mu$ M, 0.03% DMSO) were used as reference controls for activation of PPAR $\beta/\delta$ , PPAR $\alpha$  or PPAR $\gamma$ , respectively.

The effect of the treatments was evaluated on the expression of *PDK4*, *CPT1A* and *GLUT1* genes. The expression analyses were performed by real-time quantitative PCR (RTqPCR) as previously described<sup>3</sup> with minor modifications. Briefly, after treatments, cells were washed with PBS and total RNA was isolated using the TRIzol reagent (Invitrogen, Carlsbad, CA), treated with Turbo DNA-Free kit (Life Technologies), quantified using the Nanodrop 2000 (Thermo Scientific) and retro-transcribed using the High Capacity cDNA Reverse Transcription kit (Life Technologies). RTqPCR assays were performed in 96-well optical reaction plates using the PowerUp SYBR Green Master Mix (Life Technologies) on the ABI 7900HT Real-Time PCR platform (Applied Biosystem) with the following primers: 5'-AGAGCCTGATGGATTTGGTG-3' (FW) and 5'-GCTTGGGTTTCCTGTCTGTG-3' (RW) for PDK4,<sup>4</sup> 5'-TGCCATGGATCTGCTGTATATCC-3' (FW) and 5'-GCGTTGCCGGCTCTTG-3' (RW) for CPT1A;<sup>3</sup> 5'-ATCGTGGCCATCTTTGGCTTTGTG-3' (FW) and 5'-CTGGAAGCACATGCCCAATGAA-3' (RW) for GLUT1<sup>5</sup> and 5'-TGCCATCGCCAAGGAGTAG-3' (FW) and 5'-TGCACAGACGGTCACTCAAA-3' (RW) for cyclophilin (PPIB).<sup>6</sup> RTqPCR was performed in duplicate plates, with each sample analyzed in triplicate wells for each plate. Quantitative normalization was performed using the expression of PPIB as internal control. Relative quantification was performed using the DDCT method using as a calibrator the cDNA obtained from cells cultured adding only the compound's vehicle (DMSO) in the medium.



### *Ex vivo studies*

Male adult Sprague-Dawley rats (200-250 g) were housed in Plexiglas cages (40 cm × 25 cm × 15 cm), placed in climatized colony rooms (22 ± 1 °C; 60% humidity), on a 12 h/12 h light/dark cycle (light phase: 07:00–19:00 h). Rats were fed *ad libitum* a standard laboratory diet (chow; 3.20 kcal/g). Housing conditions and experimentation procedures were strictly in accordance with the EU Directive 63/2017/EU. Liver and cortex specimens were obtained as residual material from vehicle-treated rats randomized in our previous experiments approved by Italian Health Ministry (Italian Health Ministry authorization N. 880, delivered on 24<sup>th</sup> August 2015). Rats were sacrificed by CO<sub>2</sub> inhalation (100% CO<sub>2</sub> at a flow rate of 20% of the chamber volume per min), and both liver and cortex specimens were immediately collected and maintained in a humidified incubator with 5% CO<sub>2</sub> at 37°C for 4 h, in RPMI buffer with added bacterial LPS (10 µg/mL) (incubation period). During the incubation period, tissues were treated with WY14643 (1 µM), a widely used PPAR $\alpha$  activator reference agent, the PPAR $\gamma$  agonist pioglitazone (1 µM), the PPAR $\beta/\delta$  agonist L165,041 (1 µM) and scalar concentrations of **12a** (0.1–10 µM). Tissue supernatants were collected and PGE<sub>2</sub> (ng/mg wet tissue) were measured by radioimmunoassay (RIA), as previously reported.<sup>7</sup> Briefly, specific anti-PGE<sub>2</sub> were developed in the rabbit; the cross-reactivity against other prostanoids is <0.3%. One hundred microliters of prostaglandin standard or sample was incubated overnight at 4°C with the <sup>3</sup>H-prostaglandin (3000 cpm/tube; NEN) and antibody (final dilution: 1:120000), in a volume of 1.5 mL of 0.025 M phosphate buffer. Free and antibody-bound prostaglandins were separated by the addition of 100 µL 5% bovine serum albumin and 100 µL 3% charcoal suspension, followed by centrifuging for 10 min at 4000 × g at 5°C and decanting off the supernatants into scintillation fluid (UltimaGold™, Perkin Elmer) for  $\beta$  emission counting. The detection limit of the assay method is 0.6 pg/mL.

### *Statistical analysis*

Statistical analysis was performed using GraphPad Prism version 5.01 for Windows (GraphPad Software, San Diego, CA). Means  $\pm$  SEM were determined for each experimental group and analyzed by one-way analysis of variance (ANOVA), followed by Newman-Keuls comparison multiple test. Statistical significance was set as  $p < 0.05$ . As regards the animals randomized for each experimental group, the number was calculated on the basis of the “Resource Equation”  $N=(E+T)/T$  ( $10 \leq E \leq 20$ ),<sup>8</sup> according to the guidelines suggested by the “National Centre for the Replacement, Refinement and Reduction of Animals in Research” (NC3RS) and reported on the following web site: <https://www.nc3rs.org.uk/experimental-designstatistics>. In particular, N is the number of animals per treated group. E represents the degrees of freedom of the ANOVA). T is the number of treatments. Considering that E values should be between 10 and 20, the animal number N for ex vivo analysis was chosen in accordance to an E value of 20.

## Computational Chemistry

### *Protein and Ligand Preparation*

The crystal structures of PPAR $\alpha$ /**11a** (PDB ID: 4CI4), PPAR $\gamma$ /**11a** (PDB ID: 4CI5),<sup>9</sup> as well as PPAR $\delta$  in complex with the ligand 6-(2-((N-cyclopropyl-4-(furan-2-yl)benzamido)methyl)phenoxy)hexanoic acid (PDB entry: 5U3Q),<sup>10</sup> recovered from Brookhaven Protein Database, were employed for the automated docking experiments.

The proteins were processed through the Protein Preparation Wizard in Maestro version 11.0 (Schrödinger, LLC, New York, NY, 2017). X-ray water molecules were removed, the appropriate bond orders as well as charges and atom types were assigned and the hydrogen atoms were added to the three protein structures. The H-bond network was optimized by exhaustive sampling of rotamers, tautomers and protonation states of titratable amino acids at neutral pH. Imidazole rings of H440 into PPAR $\alpha$ , H449 and H323 into PPAR $\gamma$ , and H287 and H413 into PPAR $\delta$  were set in their N $\epsilon$  2-H (N *tau*-H) tautomeric state. Finally, the protein structures were relaxed with by means of a restrained minimization using the Impref module with the OPLS2005 force field by imposing a 0.3 Å rmsd limit from the initial coordinates as the constraint.

The core structures of **11a** and **12a** were sketched using the Molecular Builder module in Maestro. The ligands were then preprocessed with LigPrep 3.3 (Schrödinger, LLC, New York, NY, 2017) and optimized by means of Macromodel 11.5 (Schrödinger, LLC, New York, NY, 2017), employing the MMFFs force field with 1000 steps of steepest descent; the resulting molecules were then submitted to 500 steps of truncated Newton conjugate gradient method. Partial atomic charges were assigned using the OPLS-AA force field.

### Docking and Cluster Analysis

Docking of **11a** and **12a** to PPAR $\alpha$ , PPAR $\gamma$ , and PPAR $\delta$  was performed with the genetic algorithm implemented in GOLD software (CCDC Software Limited: Cambridge, U.K.), for. The coordinates of the cocrystallized ligands **11a** for both PPAR $\alpha$  and PPAR $\gamma$ , and 6-(2-((N-isopropyl-[1,1'-biphenyl]-4-carboxamido)methyl)phenoxy)hexanoic acid for PPAR $\delta$  were chosen as active-site origin. The active-site radius was set equal to 10 Å. For the purposes of this study, the number of GA runs was set to 1000 and the early termination option was switched off. The obtained docked poses were ranked according to the original ChemPLP scoring function and rescored with ChemScore.<sup>11</sup> Subsequently, the ACIAP program was used to perform a cluster analysis on the top 20 percent of poses.<sup>12</sup> Figure 2 in the manuscript shows the binding modes representative of the most significantly populated clusters on the basis of the Chaevenaut criterion contained in the script. Noteworthy, such poses correspond to the highest ranked poses according to ChemScore.

Figures in the manuscript were rendered with Pymol 2.0 (Schrödinger, LLC, New York, NY, 2017). All computations were performed on a E4 Computer Engineering E1080 workstation provided of a Intel Core i7-930 Quad-Core processor.

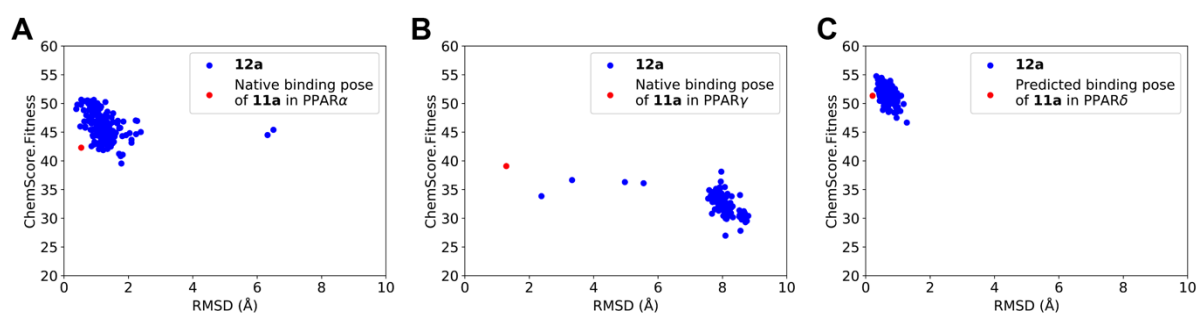

**Figure S2.** Docking of **12a** into the LBD of PPAR $\alpha$  (A), PPAR $\gamma$  (B) and PPAR $\delta$  (C) crystal structures. The RMSD between 10,000 binding poses of **12a** (shown in blue) and the pose closest to the native binding mode of **11a** (shown in red) was computed. The top 20 percent of poses by GOLD scores (ChemScore.Fitness) are shown here.

**Table S1. Docking and clustering outcomes for each of the investigated complexes<sup>a</sup>**

| Subtype       | Cluster N° | Cardinality | RMSD [Å] | ChemScore.Fitness |
|---------------|------------|-------------|----------|-------------------|
| PPAR $\alpha$ | 1          | 28          | 1.27     | 50.65             |
| PPAR $\gamma$ | 1          | 105         | 8.01     | 36.39             |
| PPAR $\delta$ | 1          | 50          | 0.33     | 54.75             |

<sup>a</sup>For clarity, only the most relevant clusters are reported. The RMSD refers to the distance between the representative pose of each cluster and that closest to the experimental one. The representative structure is defined as the configuration closest to the geometric center of the cluster.

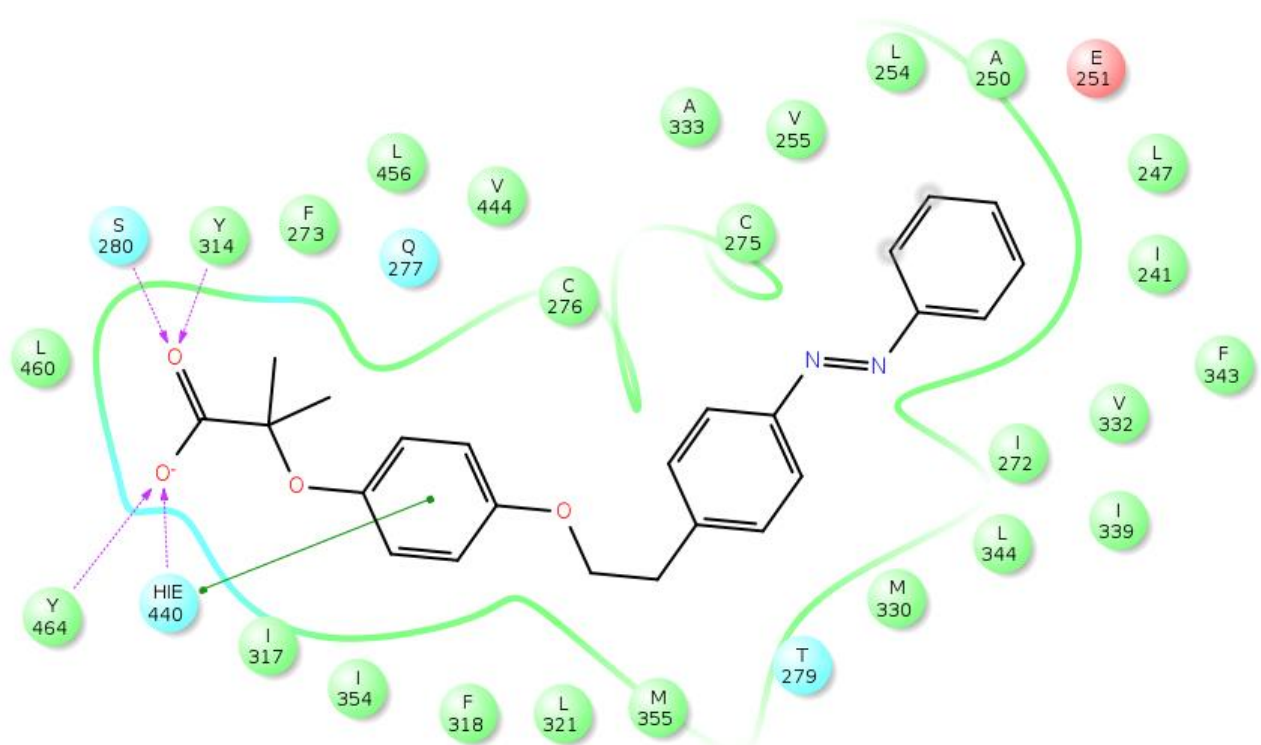

**Figure S3. 2D ligand-interaction diagram of compound 12a into the PPAR $\alpha$  binding pocket.** Positively charged amino acids are represented with dark blue circles, negatively charged amino acids are represented with red circles, polar amino acids are represented with light blue circles and hydrophobic amino acids are represented with green circles. H-bonds are depicted with purple arrows—dashed arrows for H-bonds involving amino acid side chain and regular arrows for H-bonds involving amino acid backbone. Straight green lines represent  $\pi$ -stacking interactions.

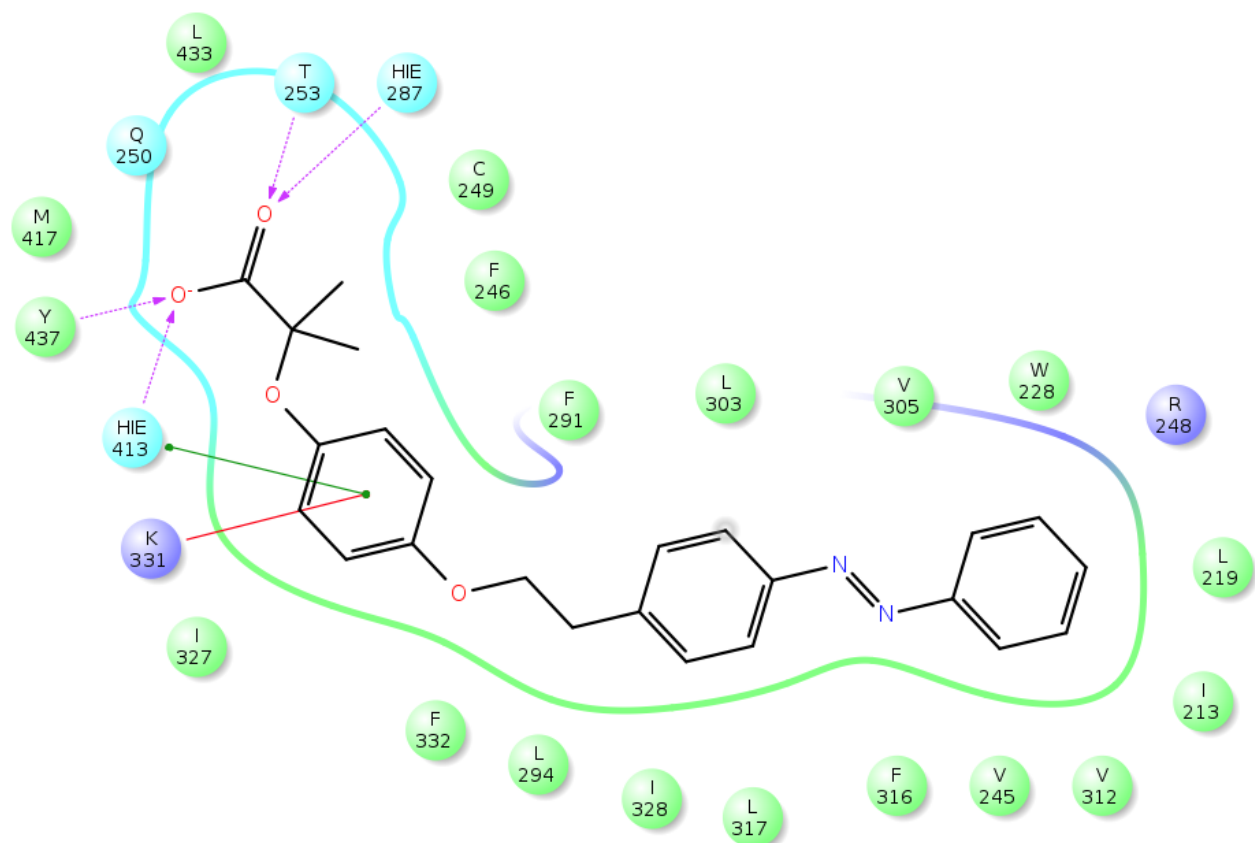

**Figure S4. 2D ligand-interaction diagram of compound 12a into the PPAR $\delta$  binding pocket.** Positively charged amino acids are represented with dark blue circles, negatively charged amino acids are represented with red circles, polar amino acids are represented with light blue circles and hydrophobic amino acids are represented with green circles. H-bonds are depicted with purple arrows—dashed arrows for H-bonds involving amino acid side chain and regular arrows for H-bonds involving amino acid backbone. Straight green lines represent  $\pi$ -stacking interactions, while straight red lines represent cation- $\pi$  interactions.

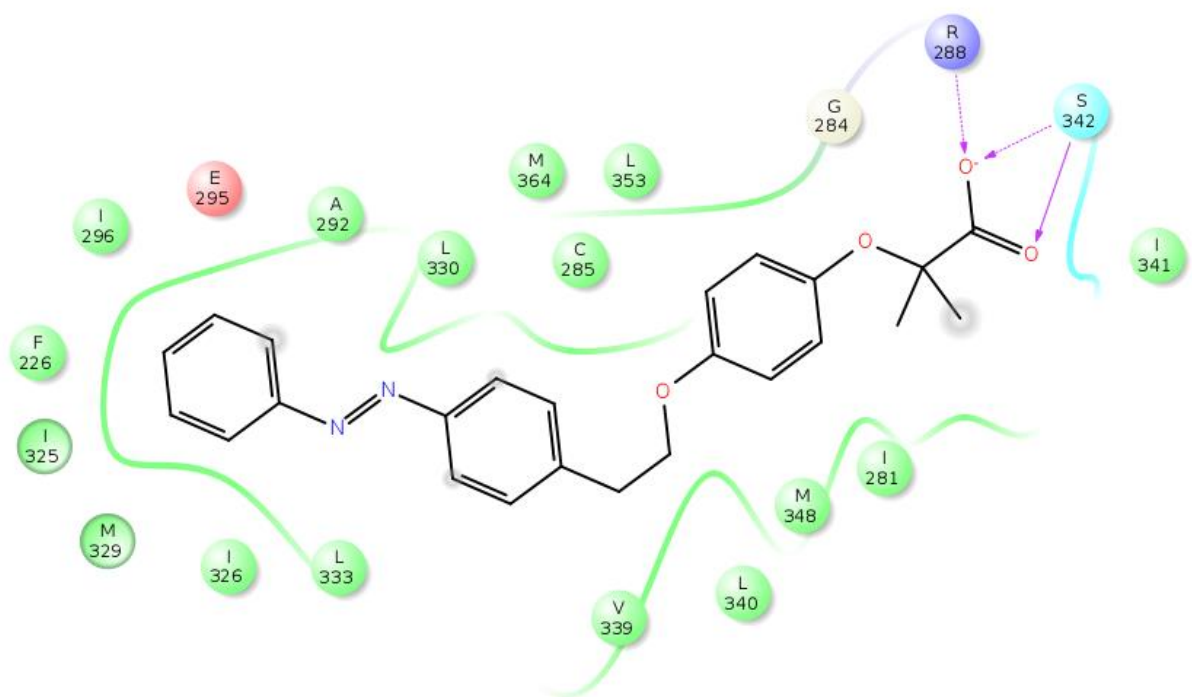

**Figure S5.** 2D ligand-interaction diagram of compound 12a into the PPAR $\gamma$  binding pocket. Positively charged amino acids are represented with dark blue circles, negatively charged amino acids are represented with red circles, polar amino acids are represented with light blue circles and hydrophobic amino acids are represented with green circles. H-bonds are depicted with purple arrows—dashed arrows for H-bonds involving amino acid side chain and regular arrows for H-bonds involving amino acid backbone.

**Table S2. Major interactions between 12a and PPAR $\alpha$ , PPAR $\delta$  and PPAR $\gamma$ .**

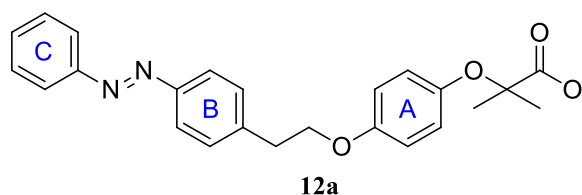

| PPAR subtype          | Type of interaction | Ligand atoms          | Residues involved       | Distance (Å) |
|-----------------------|---------------------|-----------------------|-------------------------|--------------|
| PPAR $\alpha$         | H-bond              | O <sup>-</sup>        | Y464 (OH)               | 2.5          |
|                       |                     | O <sup>-</sup>        | H440 (NE2)              | 2.6          |
|                       |                     | O                     | Y314 (OH)               | 3.1          |
|                       |                     | O                     | S280 (OG)               | 3.0          |
|                       | $\pi$ - $\pi$       | Ring A (centroid)     | H440 (centroid)         | 5.0          |
|                       | Sulphur-aromatic    | Ring C (closest atom) | C275 (SG)               | 3.7          |
|                       |                     | Ring B (closest atom) | C276 (SG)               | 3.6          |
| Ring B (closest atom) |                     | M355 (SD)             | 4.2                     |              |
| Ring B (closest atom) |                     | M330 (SD)             | 3.8                     |              |
| PPAR $\delta$         | H-bond              | O <sup>-</sup>        | Y347 (OH)               | 2.6          |
|                       |                     | O <sup>-</sup>        | H413 (NE2)              | 2.6          |
|                       |                     | O                     | H287 (NE2)              | 3.1          |
|                       |                     | O                     | T253 (OG1)              | 3.1          |
|                       | $\pi$ - $\pi$       | Ring A (centroid)     | H413 (centroid)         | 4.9          |
|                       | Cation- $\pi$       | Ring A (centroid)     | K331 (NZ)               | 5.3          |
|                       | Sulphur-aromatic    | Ring B (closest atom) | C249 (SG)               | 3.6          |
| PPAR $\gamma$         | H-bond              | O <sup>-</sup>        | S342 (OG)               | 2.9          |
|                       |                     | O <sup>-</sup>        | R288 (NE)               | 3.0          |
|                       |                     | O <sup>-</sup>        | R288 (NH <sub>2</sub> ) | 3.2          |
|                       |                     | O                     | S342 (N)                | 3.0          |
|                       | Sulphur-aromatic    | Ring A (closest atom) | C285 (SG)               | 3.0          |



### Valence-bond (or resonance) approach to azobenzene system

It is expected that the oxygen directly linked to the azobenzene system in **11a** (structure I in Figure S6) generates a different electron distribution on its mesomeric quinonic form (structure II), accommodating the negative charge on the electronegative nitrogen atom of the azo group. This charge-separated resonance form decreases the electron donor  $\pi$  orbital behavior towards the electron acceptor S–H  $\sigma^*$  orbital, negatively affecting the above mentioned sulfur-aromatic interactions. This rationalizes the lower PPAR $\alpha$  potency of **11a** with respect to **12a**.

The increase of PPAR $\alpha$  potency of **11b** and **11c** (5.5- and 2.6-fold, respectively) compared to **11a** seems due to charge delocalization onto the distal phenyl ring of azobenzene as a consequence of the electron-withdrawing character of chlorine and bromine substituents (structure V).

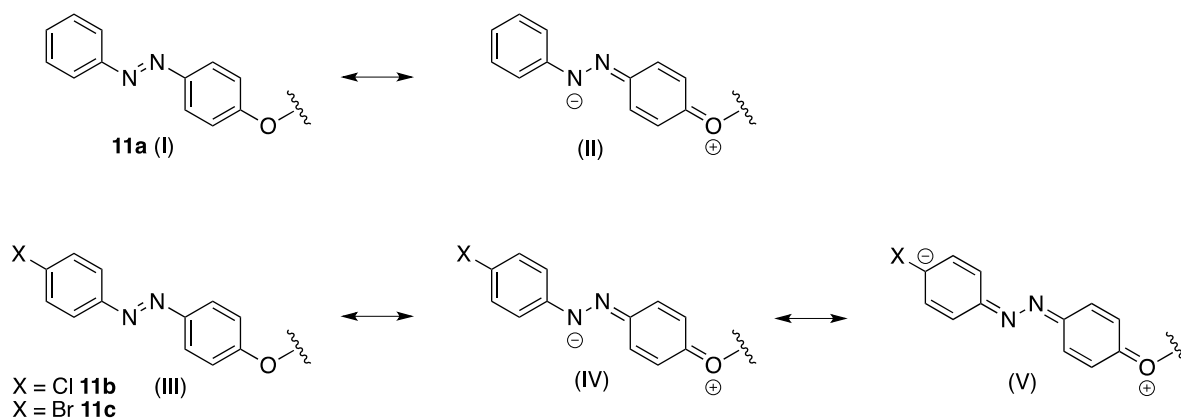

**Figure S6.** Resonance forms of derivatives **11a-c**.

## Binding mode of 12a into PPAR $\gamma$ LBD

**12a** is situated at the entrance of the active site, between H3 and the  $\beta$ -sheet, a common site of PPAR $\gamma$  partial agonists, and does not interact directly with H12. Figure S7 shows the singular mode of binding of **12a** compared with that of the PPAR $\gamma$ -bound crystal structure of **11a**.<sup>9</sup> The clofibric acid group of the ligand makes H-bonds with the main chain amide nitrogen and the oxygen atom of S342 as well as with the guanidinium group of R288. Moreover, this group establishes several hydrophobic interactions with the  $\beta$ -sheet, in particular with I341 and M348. In addition, the phenoxy oxygen of **12a** accepts a H-bond from C285 on H3. The ring bearing the clofibric moiety forms numerous hydrophobic and van der Waals contacts, further increasing the stabilization of H3, while the azobenzene tail makes hydrophobic contacts at entrance region of binding site. Therefore, the low affinity and the attenuated transcriptional response of **12a** and its derivatives towards PPAR $\gamma$  might be ascribed to the peculiar binding mode, which is not able to replicate the spectrum of contacts of full agonists.<sup>28</sup>

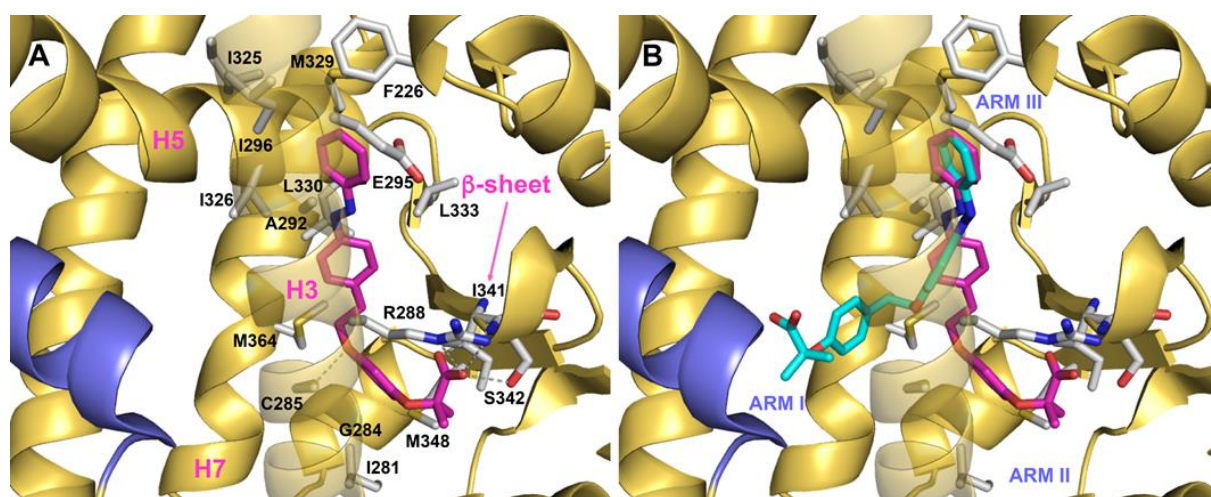

**Figure S7.** Binding mode of compound **12a** (magenta sticks) into the PPAR $\gamma$  LBD (A) represented as a yellow ribbon model. Only amino acids located within 4.5 Å of the bound ligand are displayed (white sticks) and labeled. H-bonds discussed in the text are depicted as dashed grey lines. H12 is shown in slate. (B)  $C\alpha$  superposition of the complex of PPAR $\gamma$  with compounds **12a** and **11a** (cyan sticks, PDB entry: 4CI5).

Figure S8. <sup>1</sup>H and <sup>13</sup>C spectra of final compounds 11b-g and 12a-f

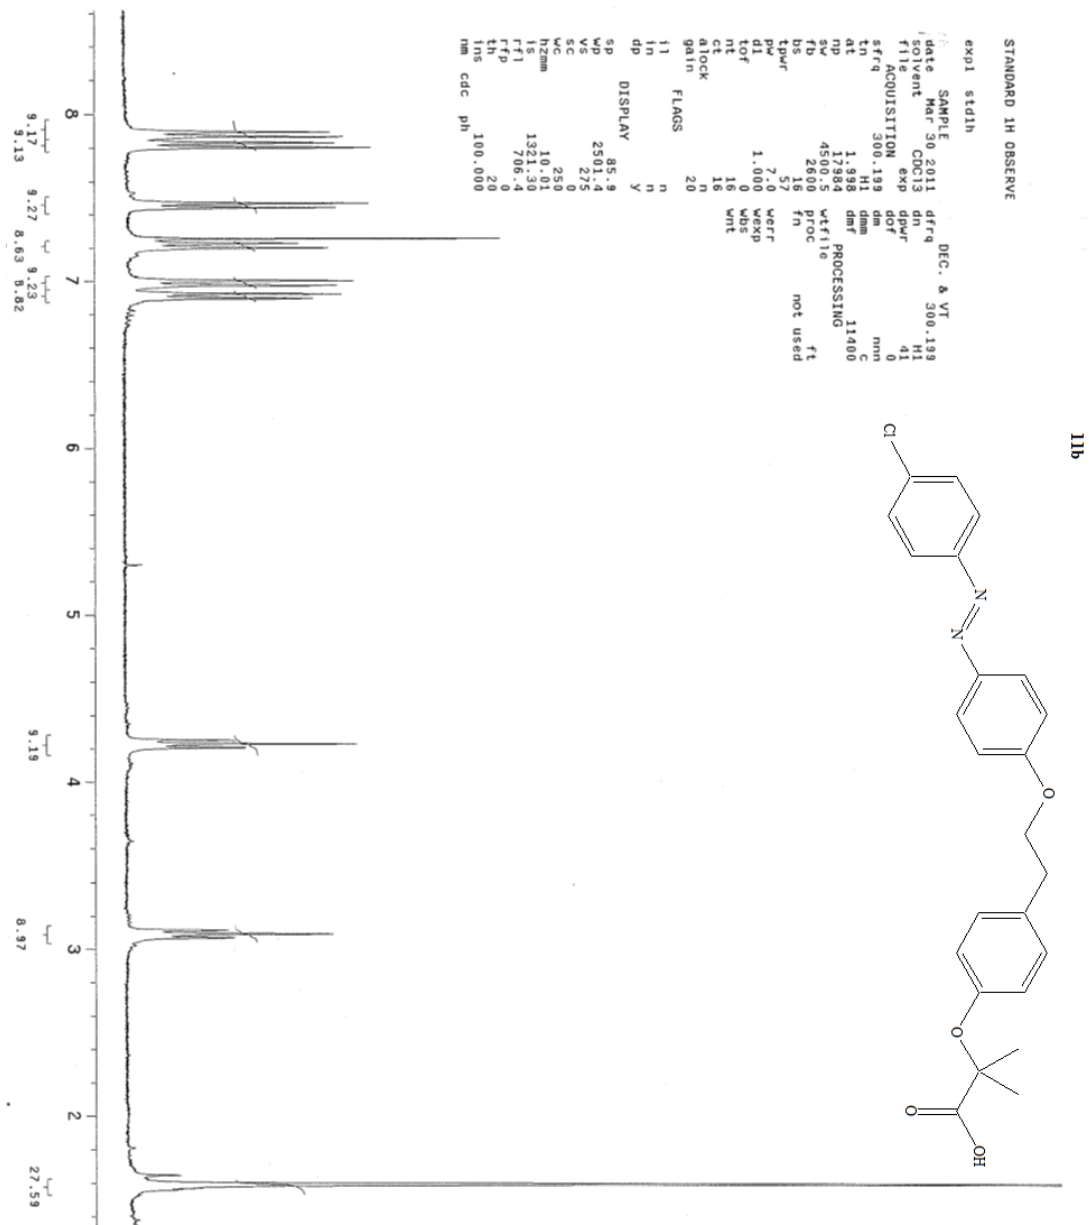

11b

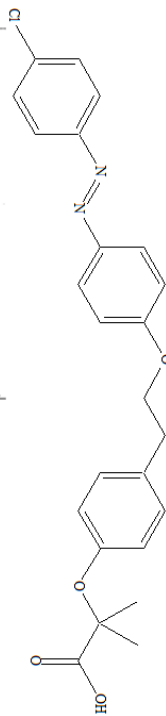

exp1 std13c  
-----  
SAMPLE 4 2011 DEC. & VT  
date May 300.199  
solvent CCl3 dn H1  
f1 le ACQUISITION exp dpwr 41  
f1 le ACQUISITION exp dpwr 41  
sfreq 75.492 dmf YVW  
tn C13 dmm W  
at 1.815 dmf 11400  
np 68106 PROCESSING 1.00  
sw 18761.7 1b wtfile  
fb 10400 proc  
us 16 fn not used  
dpwr 8.7  
p 0 weff  
dl 0 wexp  
tof 1e+08 wbs  
ct 1728 wnt  
atlock not used  
gain not used  
ll n  
in n  
dp y  
DISPLAY 286.6  
wp 1429.1  
vc 153  
wc 250  
hzam 57.20  
is 500.00  
rf1 1804.1  
rfp 20  
th 20  
rms 100.000  
nm no ph

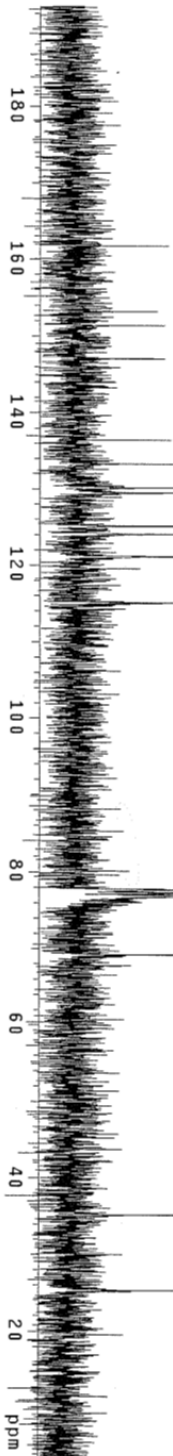



13C OBSERVE

expt1 std13c  
SAMPLE Mar 8 2011 DEC. & VT 300.133  
solvent CDCl3 dn H1  
file exp dpar H1  
ACQUISITION dof 41  
strq 75.492 dm W  
tn 1.615 dm W  
np 68106 dm 11400  
sw 18761.7 lb PROCESsing 1.00  
fb 10400 wfile  
bs 16 proc ft  
lpar 62 fn not used  
pw 8.7 wprt  
nt 1e+09 wexp  
ct 32528 wds  
a1ock not used  
gain 5 wnt  
fl 11  
in n  
dp Y  
DISPLAY 334.2  
wp 13795.2  
sc 590  
wc 250  
hzmm 55.18  
ls 500.00  
rfj 1804.1  
rfp 0  
tms 20  
nm no ph 100.000

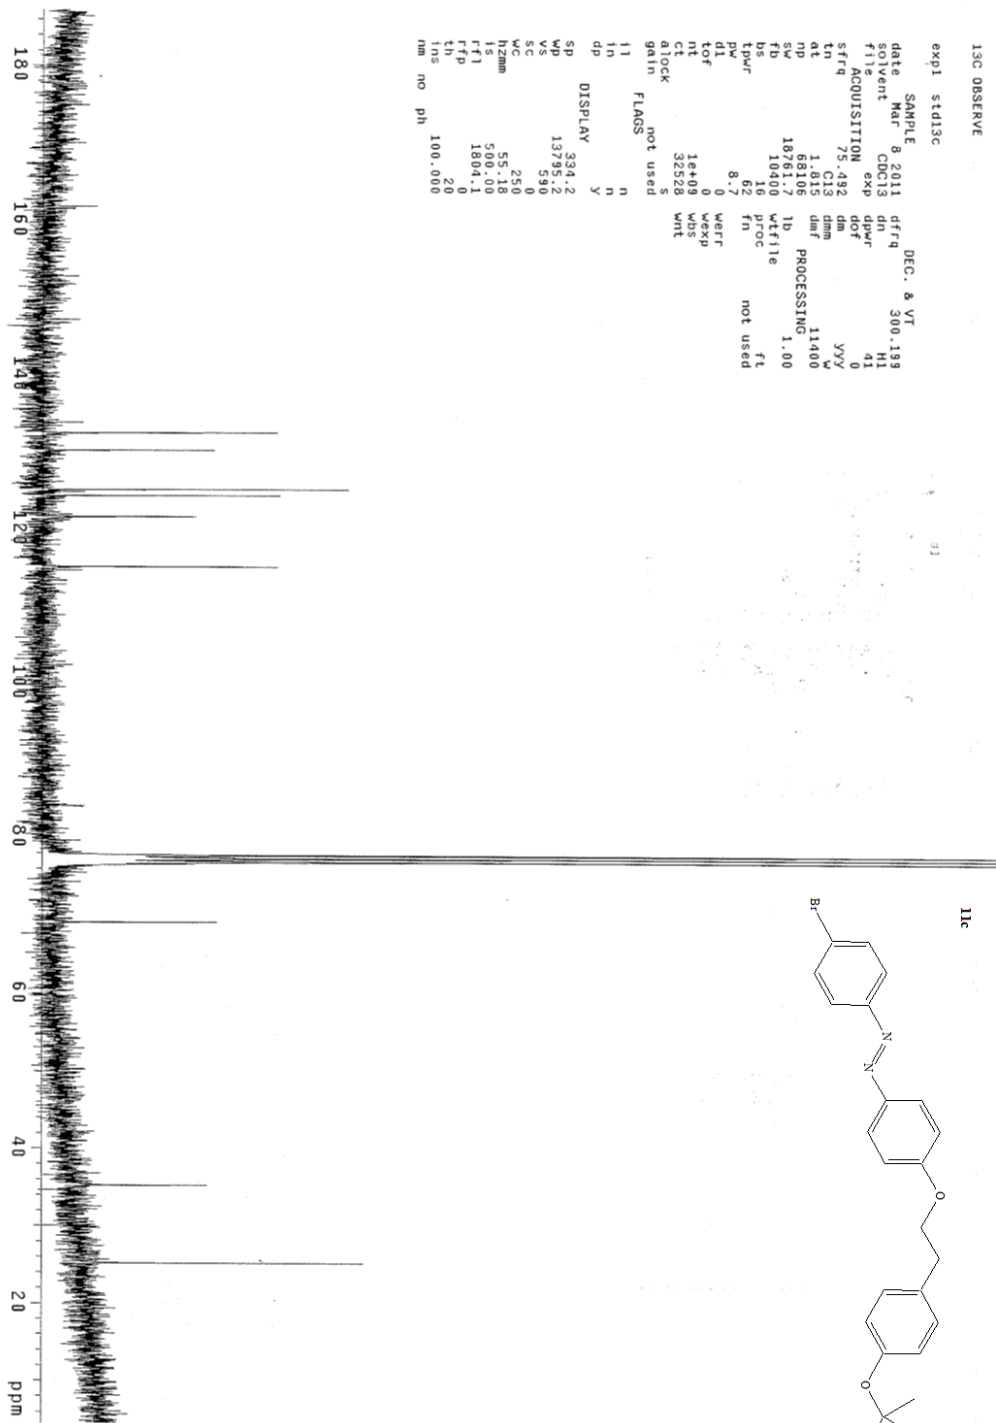

STANDARD 1H OBSERVE

11d

```

expt stdln
SAMPLE date Feb 14 2011 dfrq DEC. & VT 300.199
solvent CDCl3 dm
F1 ACQUISITION exp ddf 0
sfrq 300.199 dm
tn H1 dm 11400 C
at 1.998 dmf PROCESSING 11400
sp 17864 wtf11e ft
sw 4506.3 wtf11e not used
bs 2016 tn
tpwr 57
pw 7.0 warr
d1 1.000 wexp
tof 0 wds
nt 18 wnt
stlck 16
gain 20
flags
i1 n
in n
dp y
DISPLAY 91.9
SD 2536.3
VP 249
VS 0
WC 250
hZmm 10.15
IS 1792.26
RFJ 706.4
th 8
ins cdc ph 100.000
nm cdc ph

```

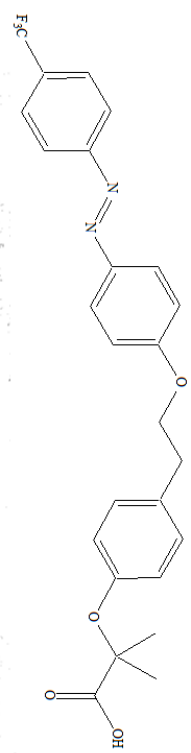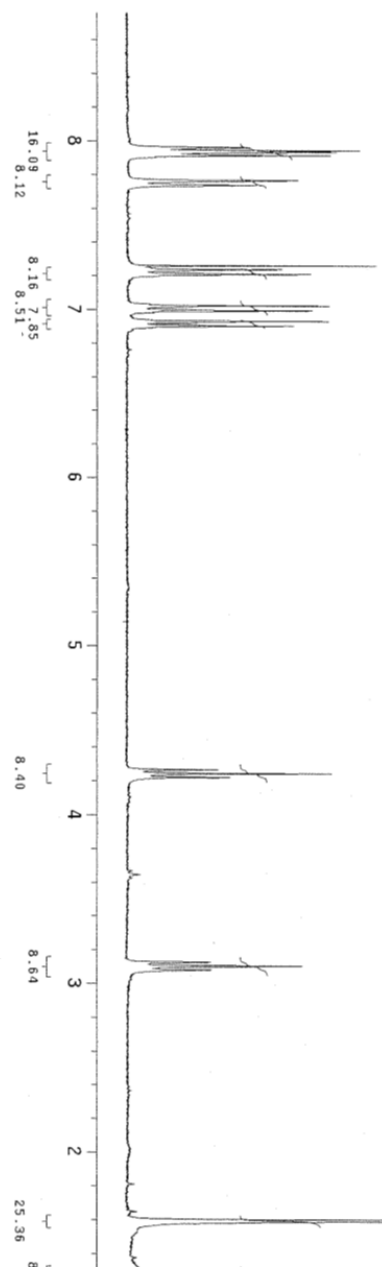

13C OBSERVE

expt1 std13c

SAMPLE DEC. & VT  
date Feb 16 2011 dfrq 300.199  
solvent CDCl3 dn H1  
file CDCl3 exp dn H1  
ACQUISITION exp dn H1  
sfrq 75.432 dm Y/Y  
tn C13 dnm W  
at 1.815 dmf 11400  
np 68106 1b ffile  
sw 18761.7 WFile 1.00  
bd 10498 WFile  
bs 52 Fw not used  
twpf 8.7 Fw not used  
pw 0 Werr  
dl 0 Wexp  
tof 1449 Wds  
nt 3198 Wht  
glock not used  
gain not used  
flags not used  
ll n  
ln n  
in n  
dp DISPLAY Y  
SP -596.6  
WD 13214.4  
VS 171  
SC 0  
WC 250  
WZmm 57.96  
WZ 17.96  
RFI 1804.1  
RFP 0  
TH 22  
ims no ph 100.000

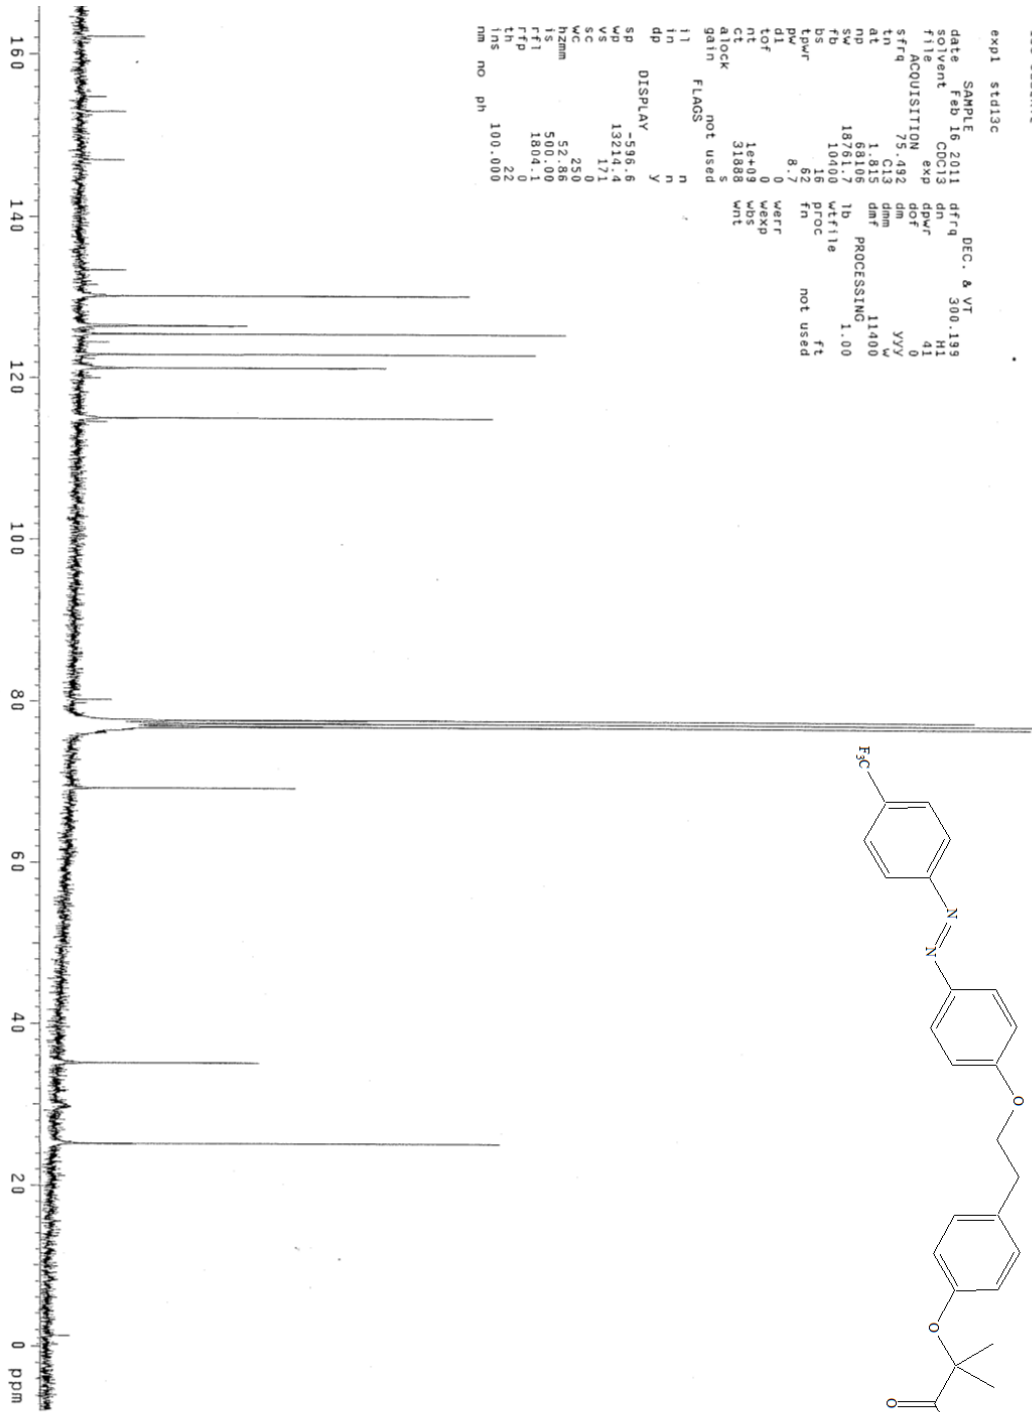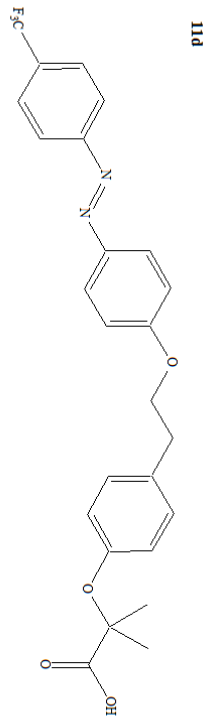



STANDARD IN OBSERVE

11e

expt std1h  
SAMPLE DEC. 8 VT 300.139  
date Mar 15 2011 dfrq  
solvent CDCl3 dn  
file exp dpwr H1  
ACQUISITION 0  
sfrq 300.139 dm  
tn H1 dm 11400  
dt 1.98 dm  
sw 17984  
sf 4500.5 wfile  
fb 2600 proc  
bs 16 fn not used  
tpwr 57  
pw 7.0 werr  
dt 1.000 wexp  
of 16 wms  
ct 16 wnt  
atock n  
gain 20  
FLAGS  
11 n  
1n n  
dn y  
DISPLAY  
sp 133.4  
vp 2436.3  
vs 140  
sc 0  
vc 250  
wcm 9  
ncmm 3798.55  
ffl 709.4  
rfp 0  
th 20  
ins cdc ph  
nm 100.000

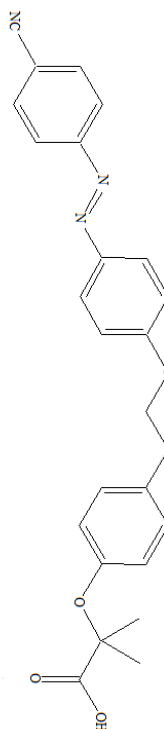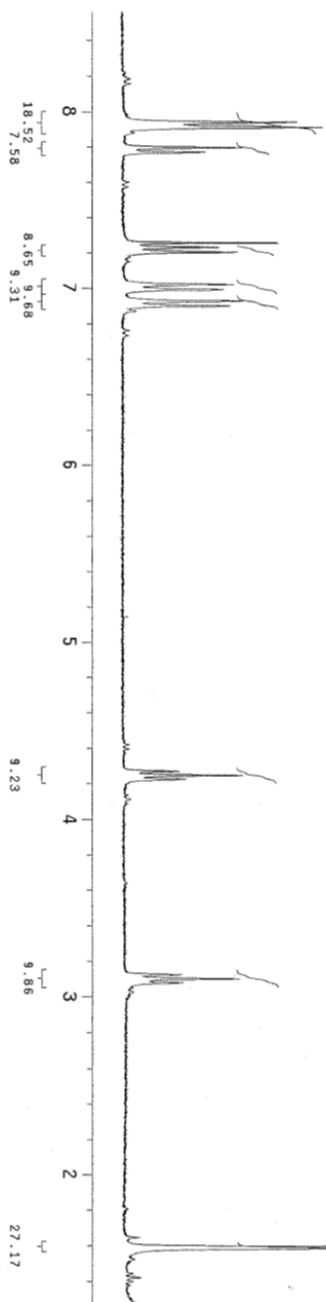

13C OBSERVE

11e

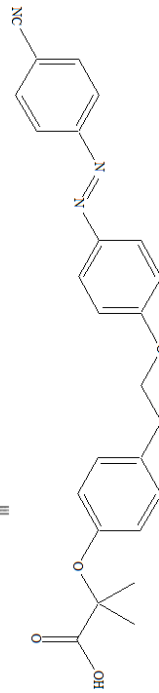

exptl std13c  
SAMPLE Mar 15 2011 DEC. & VT 300.199  
solvent CDCl3 dn H1  
file ACQUISITION exp dpwr 41  
sfrq 75.492 dm yyy  
IN 1.813 dnm 11400  
AQ 68106 dmf PROCESSING 1.00  
SW 18751.7 lb wifile  
FD 10400 wifile ft  
BS 16 PROC not used  
TPWR 62 fn  
PW 8.7  
DI 0 WERT  
DOF 10+09 WEXP  
CT 4624 WNT  
ATOCK S  
gain not used  
FLAGS  
I1 n  
I2 n  
IN n  
DP y  
DISPLAY 453.8  
WD 13954.1  
VS 200  
SC 0  
WC 250  
HZMM 53.82  
F2 1804.0  
FFP 0  
TH 20  
INS no ph 100.000

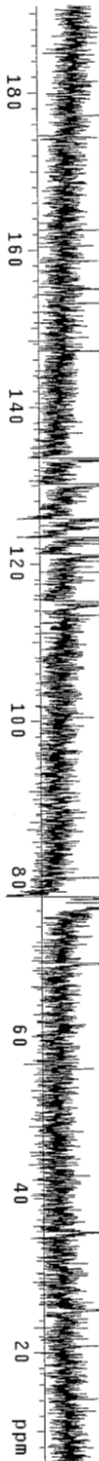

STANDARD 1H OBSERVE

11f

expl std1h  
SAMPLE  
date Nov 23 2010  
solvent Nov 23 CDC13  
file ACQUISITION  
sfrq 300.199  
tn H1  
at 1.988  
np 1.984  
sw 4396.0  
ds 2.0  
bs 16  
tpwr 57  
pw 7.0  
d1 1.000  
tof 0  
nt 16  
ct 16  
clock n  
gain n  
ll 1  
in n  
dp y  
DISPLAY  
sp 62.2  
wp 2844.5  
vs 256  
vc 250  
hzm 11.38  
is 2975.48  
rfl 706.4  
lh 0  
ins 100.000  
nm cdc ph

DEC. & VT  
300.199  
dn H1  
dppwr 41  
dof 0  
nmn C  
11400  
ft  
not used

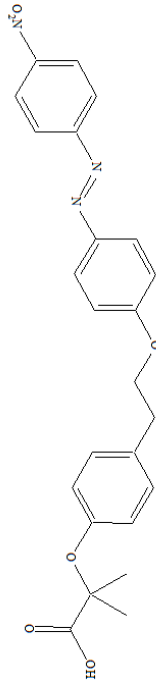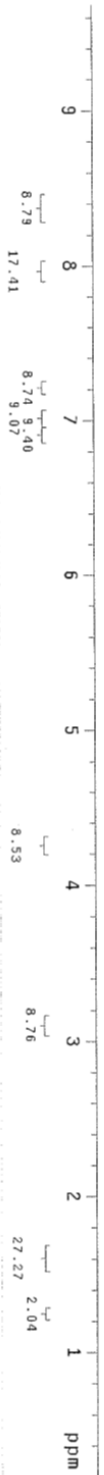

1H

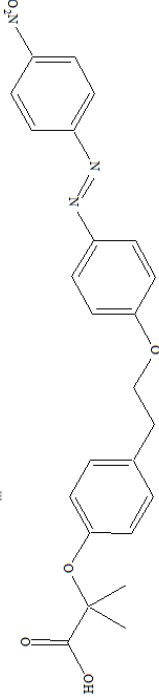

13C OBSERVE  
expt1 std13c  
SAMPLE Nov 25 2010 DEC. & VT  
date Nov 25 2010 dfrq 300.133  
solvent CDCl3 dn H1  
f1file ACQUISITION exp dpr 41  
sfreq 75.482 dot 0  
tn 1.815 yyy  
at 68106 dmf 11400  
sw 18761.7 lb wtfile 1.00  
fb 10400 proc ft  
bs 16 not used  
tpwr 82 fn  
d1w 8.7 werr  
d1v 0 wep  
tof 1e+09 wbs  
ct 4448 wnt  
atlock gain not used  
flags not used  
11 n  
1n n  
dp y  
DISPLAY  
sp 365.4  
wp 13508.9  
vs 235  
sc 0  
wc 250  
Hzmm 54.44  
f1 500.44  
rfi 1804.1  
th 0  
ins 38  
nm no ph 100.000

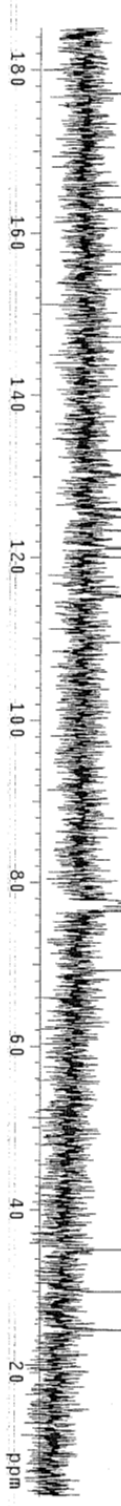



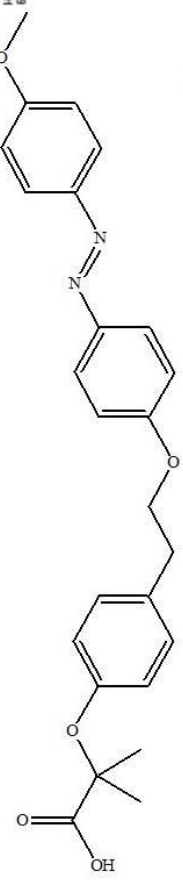

13C OBSERVE

expt statisc

SAMPLE 3 2011 DEC. 8 VT

date Mar 3 2011 dfrq 300.19 H

solvent CDCl3 dn H

file CDC13 exp dpr 4.

ACQUISITION

sfreq 75.492 dm vvy 0

an 1.813 dm

np 68106 dm 11400

sw 18761.7 lb PROCESSING 1.00

fb 10400 wfttle

bs 16 proc not used

tpwr 62 fn

pw 8.7 warr

nt 0 wexp

ct 1e+09 wds

gain 2448 wnt

atlock not used

flags

ll n

ln n

dp n

DISPLAY

sp 168.1

wp 14397.3

vs 170

vc 0

wc 250

hzmm 57.59

fs 500.00

rf1 1804.1

rf2 0

rf3 20

lfs 100.000

nm no ph

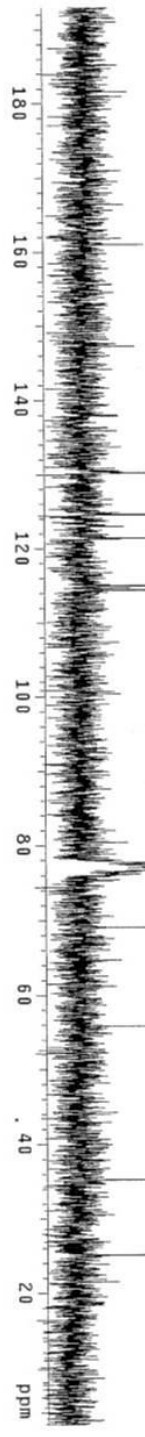

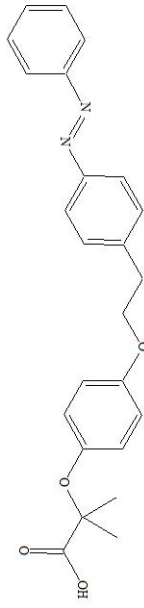

12a

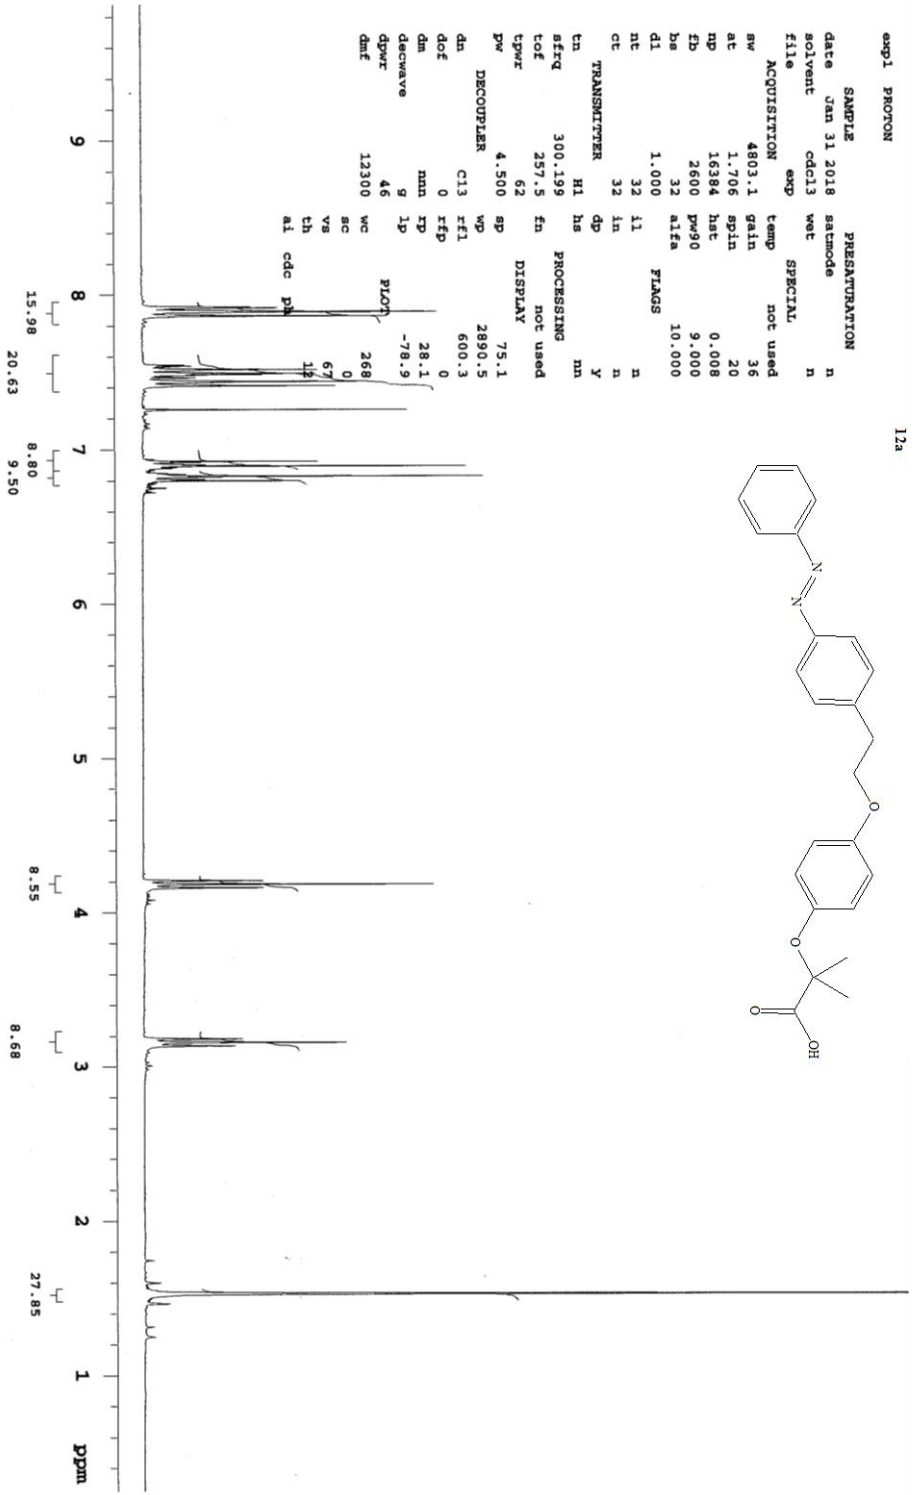

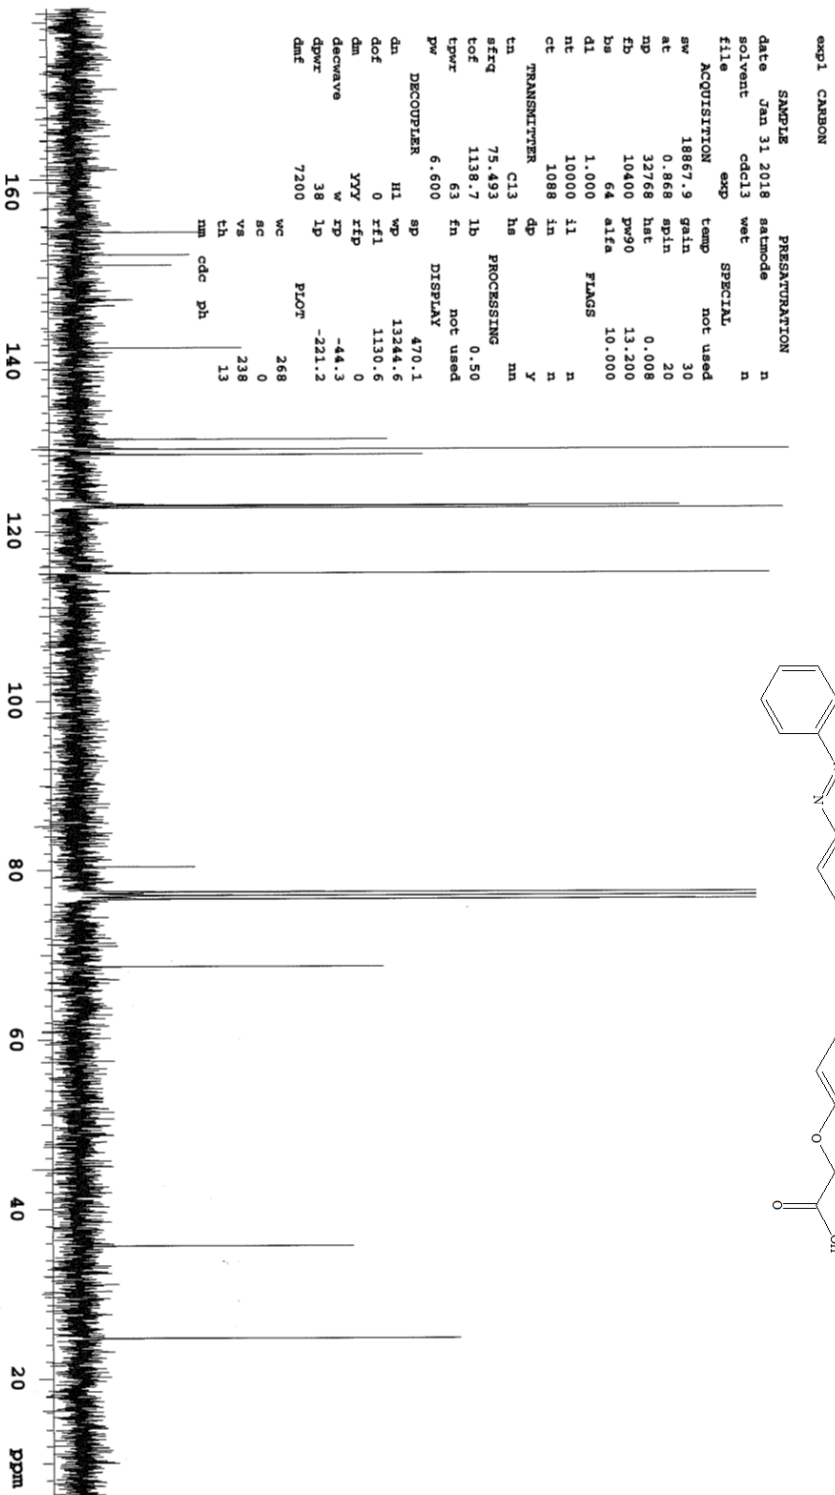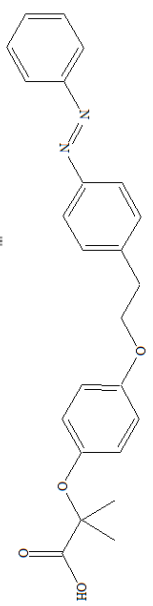



12b

STANDARD 1H OBSERVE

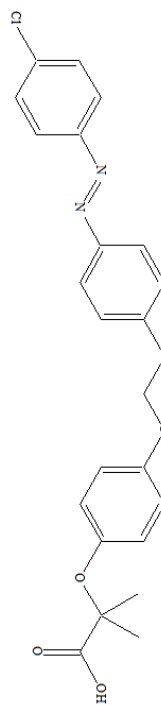

expt std1h  
SAMPLE Mar 26 2012 DEC. 8 VT  
date Mar 26 2012 dfrq 300.199  
solvent CDC13 dn H1  
file exp dpr H1  
ACQUISITION exp dof 41  
sfrq 300.199 dm 0  
tn H1 dmm nmh  
gc 1.81 dmf C  
nd 1.788 dmf PROCESSING 11400  
sd 4500.5 wfile  
fb 2600 proc ft  
bs 16 fn not used  
tpwr 57  
pw 7.0 weff  
d1 1.000 wexp  
tof 0 wds  
nt 16 wnt  
atlock 16  
gain 20  
FLAGS n  
i1 n  
in n  
dp y  
DISPLAY  
SP 427.2  
VP 240200  
WC 250  
SC 0  
h2mm 9.96  
IS 3020.49  
rfl 706.4  
tfr 0  
tfr 0  
nm cdc ph 100.000

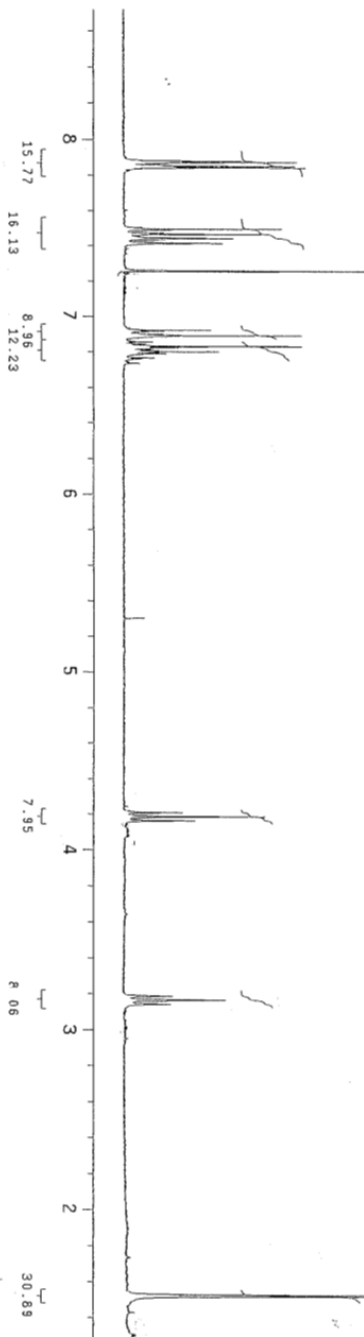

12b

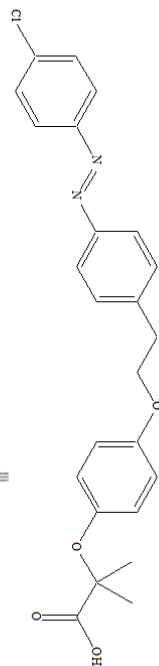

13C OBSERVE  
expt std13c  
SAMPLE May 29 2012 dfrq DEC. 6 VI 300.199  
date May 29 2012 dfrq 300.199  
solvent CDCl3 dn H1  
file CDCl3 exp dprf 41  
ACQUISITION exp dprf 41  
f1 75.482 dm yoy  
f2 75.482 dm  
at 1.815 dmf 11400  
np 68106 1b PROCESSING 1.00  
sw 18781.7 wfl1e  
fd 10400 wfl1e  
bs 45 tn not used  
bprf 87 tn  
di 0 werr  
d1 0 wexp  
nt 1e+08 wps  
ct 9.88888e+08 wnt  
gain not used  
gain FLAG not used  
i1 n  
in n  
dp y  
DISPLAY 562.6  
sp 1314.12  
vd 312  
vc 0  
wc 250  
hzmm 52.56  
is 500.00  
f1 1804.1  
f2 1804.1  
f3 20  
f4 20  
f5 20  
f6 20  
f7 20  
f8 20  
f9 20  
f10 20  
f11 20  
f12 20  
f13 20  
f14 20  
f15 20  
f16 20  
f17 20  
f18 20  
f19 20  
f20 20  
nm no ph 100.000

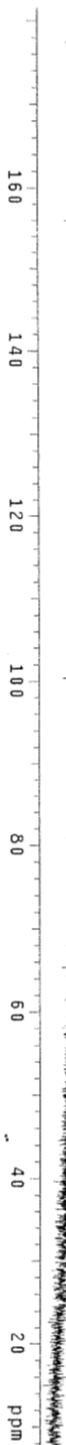

STANDARD 1H OBSERVE

12c

expt stcdh  
SAMPLE  
date Jan 30 2013 dfrq DEC. & VT 300.189  
solvent CDCl3 dn H1  
file ACQUISITION exp dpr H1  
sfrq 300.189 dm mnm  
in H1 dm  
at 1.995 dmf PROCESSING 200  
np 17884 wff1ie  
sw 4508.5 not used ft  
bs not used in not used  
tpwr 57  
pw 7.0 wefr  
d1 1.000 wexp  
tof 0 wns  
ct 16 wnt  
alock not used  
gain not used  
flags n  
1) n  
1n n  
dp y  
DISPLAY  
sp -4.7  
wp 2713.8  
sc 300  
wc 265  
h2mm 10.23  
ls 855.05  
ftl 709.4  
th 20  
nm cdc ph 100.000

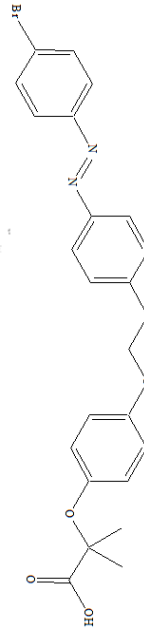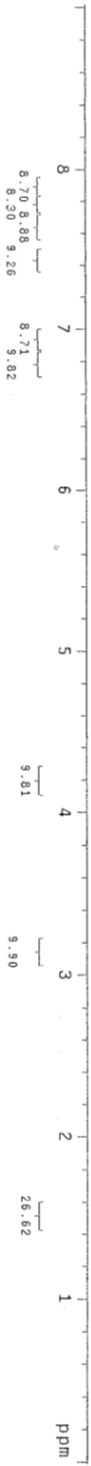

12c

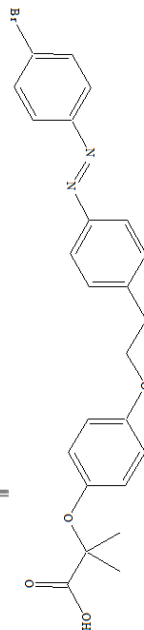

13C OBSERVE  
expi std13c  
SAMPLE DFC. & VT  
date Apr 22 2013 dfrq 300.139  
solvent CDCl3 dn H1  
file exp dpvr 41  
ACQUISITION exp dcf 0  
sfrq 75.482 dm yyy  
41 41  
nt 1.815 dm  
sw 18761.7 lb PROCESSING 11400  
fb 10400 w+11e 1.00  
ds 16 proc not used  
dpvr 8.7 tn  
d1 0 weff  
tof 1e+08 wds  
nt 29880 wnt  
clock  
gain not used  
flags  
11 n  
1n n  
dp DISPLAY y  
sp -1803.8  
wp 18761.4  
vs 161  
sc 268  
hzmm 70.80  
ts 500.00  
rf1 1804.1  
rfp 0  
ths 2  
nm no ph 100.000

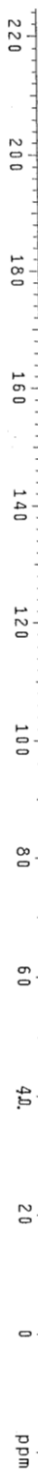



Gradient Shimming

exp1 CARBON

```
SAMPLE PREPARATION
date Feb 1 2018 satmode n
solvent cd3od wet n
file /home/giampi/- SPECIAL
vnmrsgs/data/GL605- temp not used
_C13.fid gain 30
ACQUISITION spin 20
sw 18867.9 hat 0.008
at 0.868 pw90 13.200
np 32768 alfa 10.000
fb 10400 FLAGS
bs 64 il n
dl 1.000 in n
nt 10000 dp y
ct 10000 hs nm
TRANSMITTER PROCESSING
tn C13 lb 0.50
strq 75.493 fn not used
tof 1138.7 DISPLAY
tpwr 63 sp 138.5
pw 6.600 wp 13144.4
DECOUPLER rfi 1130.6
dn H1 rfp 0
dof 0 xp 14.7
dm yxy lp -237.7
decoupe v PLOT
dpr 38 wc 268
dmf 7200 vs 0
ai cdc ph 26
```

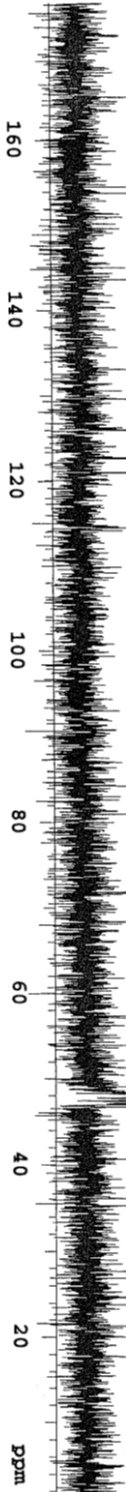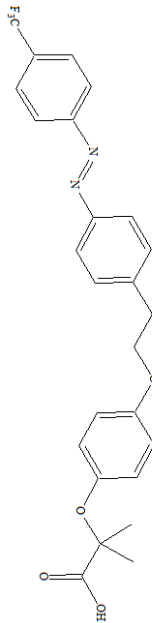

124

12e

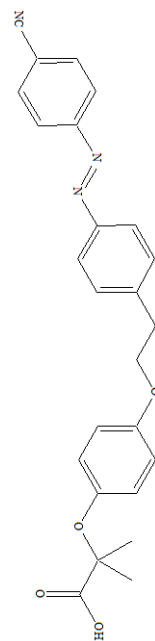

STANDARD 1H OBSERVE

expt std1h  
SAMPLE DEC. A VT  
date Jun 12 2013 dfrq 300.199  
solvent CDC13 dn H1  
file ACQUISITION exp dpwr 30  
ACQUISITION 0  
dof 0  
mnm  
dfrq 300.199 dm  
in 1.995 dmf  
44 17884  
nd 4506.5 wtfile  
sw not used  
fb not used  
bs 16 fn  
15 not used  
16  
17  
18  
19  
20  
21  
22  
23  
24  
25  
26  
27  
28  
29  
30  
31  
32  
33  
34  
35  
36  
37  
38  
39  
40  
41  
42  
43  
44  
45  
46  
47  
48  
49  
50  
51  
52  
53  
54  
55  
56  
57  
58  
59  
60  
61  
62  
63  
64  
65  
66  
67  
68  
69  
70  
71  
72  
73  
74  
75  
76  
77  
78  
79  
80  
81  
82  
83  
84  
85  
86  
87  
88  
89  
90  
91  
92  
93  
94  
95  
96  
97  
98  
99  
100  
101  
102  
103  
104  
105  
106  
107  
108  
109  
110  
111  
112  
113  
114  
115  
116  
117  
118  
119  
120  
121  
122  
123  
124  
125  
126  
127  
128  
129  
130  
131  
132  
133  
134  
135  
136  
137  
138  
139  
140  
141  
142  
143  
144  
145  
146  
147  
148  
149  
150  
151  
152  
153  
154  
155  
156  
157  
158  
159  
160  
161  
162  
163  
164  
165  
166  
167  
168  
169  
170  
171  
172  
173  
174  
175  
176  
177  
178  
179  
180  
181  
182  
183  
184  
185  
186  
187  
188  
189  
190  
191  
192  
193  
194  
195  
196  
197  
198  
199  
200  
201  
202  
203  
204  
205  
206  
207  
208  
209  
210  
211  
212  
213  
214  
215  
216  
217  
218  
219  
220  
221  
222  
223  
224  
225  
226  
227  
228  
229  
230  
231  
232  
233  
234  
235  
236  
237  
238  
239  
240  
241  
242  
243  
244  
245  
246  
247  
248  
249  
250  
251  
252  
253  
254  
255  
256  
257  
258  
259  
260  
261  
262  
263  
264  
265  
266  
267  
268  
269  
270  
271  
272  
273  
274  
275  
276  
277  
278  
279  
280  
281  
282  
283  
284  
285  
286  
287  
288  
289  
290  
291  
292  
293  
294  
295  
296  
297  
298  
299  
300  
301  
302  
303  
304  
305  
306  
307  
308  
309  
310  
311  
312  
313  
314  
315  
316  
317  
318  
319  
320  
321  
322  
323  
324  
325  
326  
327  
328  
329  
330  
331  
332  
333  
334  
335  
336  
337  
338  
339  
340  
341  
342  
343  
344  
345  
346  
347  
348  
349  
350  
351  
352  
353  
354  
355  
356  
357  
358  
359  
360  
361  
362  
363  
364  
365  
366  
367  
368  
369  
370  
371  
372  
373  
374  
375  
376  
377  
378  
379  
380  
381  
382  
383  
384  
385  
386  
387  
388  
389  
390  
391  
392  
393  
394  
395  
396  
397  
398  
399  
400  
401  
402  
403  
404  
405  
406  
407  
408  
409  
410  
411  
412  
413  
414  
415  
416  
417  
418  
419  
420  
421  
422  
423  
424  
425  
426  
427  
428  
429  
430  
431  
432  
433  
434  
435  
436  
437  
438  
439  
440  
441  
442  
443  
444  
445  
446  
447  
448  
449  
450  
451  
452  
453  
454  
455  
456  
457  
458  
459  
460  
461  
462  
463  
464  
465  
466  
467  
468  
469  
470  
471  
472  
473  
474  
475  
476  
477  
478  
479  
480  
481  
482  
483  
484  
485  
486  
487  
488  
489  
490  
491  
492  
493  
494  
495  
496  
497  
498  
499  
500  
501  
502  
503  
504  
505  
506  
507  
508  
509  
510  
511  
512  
513  
514  
515  
516  
517  
518  
519  
520  
521  
522  
523  
524  
525  
526  
527  
528  
529  
530  
531  
532  
533  
534  
535  
536  
537  
538  
539  
540  
541  
542  
543  
544  
545  
546  
547  
548  
549  
550  
551  
552  
553  
554  
555  
556  
557  
558  
559  
560  
561  
562  
563  
564  
565  
566  
567  
568  
569  
570  
571  
572  
573  
574  
575  
576  
577  
578  
579  
580  
581  
582  
583  
584  
585  
586  
587  
588  
589  
590  
591  
592  
593  
594  
595  
596  
597  
598  
599  
600  
601  
602  
603  
604  
605  
606  
607  
608  
609  
610  
611  
612  
613  
614  
615  
616  
617  
618  
619  
620  
621  
622  
623  
624  
625  
626  
627  
628  
629  
630  
631  
632  
633  
634  
635  
636  
637  
638  
639  
640  
641  
642  
643  
644  
645  
646  
647  
648  
649  
650  
651  
652  
653  
654  
655  
656  
657  
658  
659  
660  
661  
662  
663  
664  
665  
666  
667  
668  
669  
670  
671  
672  
673  
674  
675  
676  
677  
678  
679  
680  
681  
682  
683  
684  
685  
686  
687  
688  
689  
690  
691  
692  
693  
694  
695  
696  
697  
698  
699  
700  
701  
702  
703  
704  
705  
706  
707  
708  
709  
710  
711  
712  
713  
714  
715  
716  
717  
718  
719  
720  
721  
722  
723  
724  
725  
726  
727  
728  
729  
730  
731  
732  
733  
734  
735  
736  
737  
738  
739  
740  
741  
742  
743  
744  
745  
746  
747  
748  
749  
750  
751  
752  
753  
754  
755  
756  
757  
758  
759  
760  
761  
762  
763  
764  
765  
766  
767  
768  
769  
770  
771  
772  
773  
774  
775  
776  
777  
778  
779  
780  
781  
782  
783  
784  
785  
786  
787  
788  
789  
790  
791  
792  
793  
794  
795  
796  
797  
798  
799  
800  
801  
802  
803  
804  
805  
806  
807  
808  
809  
810  
811  
812  
813  
814  
815  
816  
817  
818  
819  
820  
821  
822  
823  
824  
825  
826  
827  
828  
829  
830  
831  
832  
833  
834  
835  
836  
837  
838  
839  
840  
841  
842  
843  
844  
845  
846  
847  
848  
849  
850  
851  
852  
853  
854  
855  
856  
857  
858  
859  
860  
861  
862  
863  
864  
865  
866  
867  
868  
869  
870  
871  
872  
873  
874  
875  
876  
877  
878  
879  
880  
881  
882  
883  
884  
885  
886  
887  
888  
889  
890  
891  
892  
893  
894  
895  
896  
897  
898  
899  
900  
901  
902  
903  
904  
905  
906  
907  
908  
909  
910  
911  
912  
913  
914  
915  
916  
917  
918  
919  
920  
921  
922  
923  
924  
925  
926  
927  
928  
929  
930  
931  
932  
933  
934  
935  
936  
937  
938  
939  
940  
941  
942  
943  
944  
945  
946  
947  
948  
949  
950  
951  
952  
953  
954  
955  
956  
957  
958  
959  
960  
961  
962  
963  
964  
965  
966  
967  
968  
969  
970  
971  
972  
973  
974  
975  
976  
977  
978  
979  
980  
981  
982  
983  
984  
985  
986  
987  
988  
989  
990  
991  
992  
993  
994  
995  
996  
997  
998  
999  
1000  
1001  
1002  
1003  
1004  
1005  
1006  
1007  
1008  
1009  
1010  
1011  
1012  
1013  
1014  
1015  
1016  
1017  
1018  
1019  
1020  
1021  
1022  
1023  
1024  
1025  
1026  
1027  
1028  
1029  
1030  
1031  
1032  
1033  
1034  
1035  
1036  
1037  
1038  
1039  
1040  
1041  
1042  
1043  
1044  
1045  
1046  
1047  
1048  
1049  
1050  
1051  
1052  
1053  
1054  
1055  
1056  
1057  
1058  
1059  
1060  
1061  
1062  
1063  
1064  
1065  
1066  
1067  
1068  
1069  
1070  
1071  
1072  
1073  
1074  
1075  
1076  
1077  
1078  
1079  
1080  
1081  
1082  
1083  
1084  
1085  
1086  
1087  
1088  
1089  
1090  
1091  
1092  
1093  
1094  
1095  
1096  
1097  
1098  
1099  
1100  
1101  
1102  
1103  
1104  
1105  
1106  
1107  
1108  
1109  
1110  
1111  
1112  
1113  
1114  
1115  
1116  
1117  
1118  
1119  
1120  
1121  
1122  
1123  
1124  
1125  
1126  
1127  
1128  
1129  
1130  
1131  
1132  
1133  
1134  
1135  
1136  
1137  
1138  
1139  
1140  
1141  
1142  
1143  
1144  
1145  
1146  
1147  
1148  
1149  
1150  
1151  
1152  
1153  
1154  
1155  
1156  
1157  
1158  
1159  
1160  
1161  
1162  
1163  
1164  
1165  
1166  
1167  
1168  
1169  
1170  
1171  
1172  
1173  
1174  
1175  
1176  
1177  
1178  
1179  
1180  
1181  
1182  
1183  
1184  
1185  
1186  
1187  
1188  
1189  
1190  
1191  
1192  
1193  
1194  
1195  
1196  
1197  
1198  
1199  
1200  
1201  
1202  
1203  
1204  
1205  
1206  
1207  
1208  
1209  
1210  
1211  
1212  
1213  
1214  
1215  
1216  
1217  
1218  
1219  
1220  
1221  
1222  
1223  
1224  
1225  
1226  
1227  
1228  
1229  
1230  
1231  
1232  
1233  
1234  
1235  
1236  
1237  
1238  
1239  
1240  
1241  
1242  
1243  
1244  
1245  
1246  
1247  
1248  
1249  
1250  
1251  
1252  
1253  
1254  
1255  
1256  
1257  
1258  
1259  
1260  
1261  
1262  
1263  
1264  
1265  
1266  
1267  
1268  
1269  
1270  
1271  
1272  
1273  
1274  
1275  
1276  
1277  
1278  
1279  
1280  
1281  
1282  
1283  
1284  
1285  
1286  
1287  
1288  
1289  
1290  
1291  
1292  
1293  
1294  
1295  
1296  
1297  
1298  
1299  
1300  
1301  
1302  
1303  
1304  
1305  
1306  
1307  
1308  
1309  
1310  
1311  
1312  
1313  
1314  
1315  
1316  
1317  
1318  
1319  
1320  
1321  
1322  
1323  
1324  
1325  
1326  
1327  
1328  
1329  
1330  
1331  
1332  
1333  
1334  
1335  
1336  
1337  
1338  
1339  
1340  
1341  
1342  
1343  
1344  
1345  
1346  
1347  
1348  
1349  
1350  
1351  
1352  
1353  
1354  
1355  
1356  
1357  
1358  
1359  
1360  
1361  
1362  
1363  
1364  
1365  
1366  
1367  
1368  
1369  
1370  
1371  
1372  
1373  
1374  
1375  
1376  
1377  
1378  
1379  
1380  
1381  
1382  
1383  
1384  
1385  
1386  
1387  
1388  
1389  
1390  
1391  
1392  
1393  
1394  
1395  
1396  
1397  
1398  
1399  
1400  
1401  
1402  
1403  
1404  
1405  
1406  
1407  
1408  
1409  
1410  
1411  
1412  
1413  
1414  
1415  
1416  
1417  
1418  
1419  
1420  
1421  
1422  
1423  
1424  
1425  
1426  
1427  
1428  
1429  
1430  
1431  
1432  
1433  
1434  
1435  
1436  
1437  
1438  
1439  
1440  
1441  
1442  
1443  
1444  
1445  
1446  
1447  
1448  
1449  
1450  
1451  
1452  
1453  
1454  
1455  
1456  
1457  
1458  
1459  
1460  
1461  
1462  
1463  
1464  
1465  
1466  
1467  
1468  
1469  
1470  
1471  
1472  
1473  
1474  
1475  
1476  
1477  
1478  
1479  
1480  
1481  
1482  
1483  
1484  
1485  
1486  
1487  
1488  
1489  
1490  
1491  
1492  
1493  
1494  
1495  
1496  
1497  
1498  
1499  
1500  
1501  
1502  
1503  
1504  
1505  
1506  
1507  
1508  
1509  
1510  
1511  
1512  
1513  
1514  
1515  
1516  
1517  
1518  
1519  
1520  
1521  
1522  
1523  
1524  
1525  
1526  
1527  
1528  
1529  
1530  
1531  
1532  
1533  
1534  
1535  
1536  
1537  
1538  
1539  
1540  
1541  
1542  
1543  
1544  
1545  
1546  
1547  
1548  
1549  
1550  
1551  
1552  
1553  
1554  
1555  
1556  
1557  
1558  
1559  
1560  
1561  
1562  
1563  
1564  
1565  
1566  
1567  
1568  
1569  
1570  
1571  
1572  
1573  
1574  
1575  
1576  
1577  
1578  
1579  
1580  
1581  
1582  
1583  
1584  
1585  
1586  
1587  
1588  
1589  
1590  
1591  
1592  
1593  
1594  
1595  
1596  
1597  
1598  
1599  
1600  
1601  
1602  
1603  
1604  
1605  
1606  
1607  
1608  
1609  
1610  
1611  
1612  
1613  
1614  
1615  
1616  
1617  
1618  
1619  
1620  
1621  
1622  
1623  
1624  
1625  
1626  
1627  
1628  
1629  
1630  
1631  
1632  
1633  
1634  
1635  
1636  
1637  
1638  
1639  
1640  
1641  
1642  
1643  
1644  
1645  
1646  
1647  
1648  
1649  
1650  
1651  
1652  
1653  
1654  
1655  
1656  
1657  
1658  
1659  
1660  
1661  
1662  
1663  
1664  
1665  
1666  
1667  
1668  
1669  
1670  
1671  
1672  
1673  
1674  
1675  
1676  
1677  
1678  
1679  
1680  
1681  
1682  
1683  
1684  
1685  
1686  
1687  
1688  
1689  
1690  
1691  
1692  
1693  
1694  
1695  
1696  
1697  
1698  
1699  
1700  
1701  
1702  
1703  
1704  
1705  
1706  
1707  
1708  
1709  
1710  
1711  
1712  
1713  
1714  
1715  
1716  
1717  
1718  
1719  
1720  
1721  
1722  
1723  
1724  
1725  
1726  
1727  
1728  
1729  
1730  
1731  
1732  
1733  
1734  
1735  
1736  
1737  
1738  
1739  
1740  
1741  
1742  
1743  
1744  
1745  
1746  
1747  
1748  
1749  
1750  
1751  
1752  
1753  
1754  
1755  
1756  
1757  
1758  
1759  
1760  
1761  
1762  
1763  
1764  
1765  
1766  
1767  
1768  
1769  
1770  
1771  
1772  
1773  
1774  
1775  
1776  
1777  
1778  
1779  
1780  
1781  
1782  
1783  
1784  
1785  
1786  
1787  
1788  
1789  
1790  
1791  
1792  
1793  
1794  
1795  
1796  
1797  
1798  
1799  
1800  
1801  
1802  
1803  
1804  
1805  
1806  
1807  
1808  
1809  
1810  
1811  
1812  
1813  
1814  
1815  
1816  
1817  
1818  
1819  
1820  
1821  
1822  
1823  
1824  
1825  
1826  
1827  
1828  
1829  
1830  
1831  
1832  
1833  
1834  
1835  
1836  
1837  
1838  
1839  
1840  
1841  
1842  
1843  
1844  
1845  
1846  
1847  
1848  
1849  
1850  
1851  
1852  
1853  
1854  
1855  
1856  
1857  
1858  
1859  
1860  
1861  
1862  
1863  
1864  
1865  
1866  
1867  
1868  
1869  
1870  
1871  
1872  
1873  
1874  
1875  
1876  
1877  
1878  
1879  
1880  
1881  
1882  
1883  
1884  
1885  
1886  
1887  
1888  
1889  
1890  
1891  
1892  
1893  
1894  
1895  
1896  
1897  
1898  
1899  
1900  
1901  
1902  
1903  
1904  
1905  
1906  
1907  
1908  
1909  
1910  
1911  
1912  
1913  
1914  
1915  
1916  
1917  
1918  
1919  
1920  
1921  
1922  
1923  
1924  
1925  
1926  
1927  
1928  
1929  
1930  
1931  
1932  
1933  
1934  
1935  
1936  
1937  
1938  
1939  
1940  
1941  
1942  
1943  
1944  
1945  
1946  
1947  
1948  
1949  
1950  
1951  
1952  
1953  
1954  
1955  
1956  
1957  
1958  
1959  
1960  
1961  
1962  
1963  
1964  
1965  
1966  
1967  
1968  
1969  
1970  
1971  
1972  
1973  
1974  
1975  
1976  
1977  
1978  
1979  
1980  
1981  
1982  
1983  
1984  
1985  
1986  
1987  
1988  
1989  
1990  
1991  
1992  
1993  
1994  
1995  
1996  
1997  
1998  
1999  
2000  
2001  
2002  
2003  
2004  
2005  
2006  
2007  
2008  
2009  
2010  
2011  
2012  
2013  
2014  
2015  
2016  
2017  
2018  
2019  
2020  
2021  
2022  
2023  
2024  
2025  
2026  
2027  
2028  
2029  
2030  
2031  
2032  
2033  
2034  
2035  
2036  
2037  
2038  
2039  
2040  
2041  
2042  
2043  
2044  
2045  
2046  
2047  
2048  
2049  
2050  
2051  
2052  
2053  
2054  
2055  
2056  
2057  
2058  
2059  
2060  
2061  
2062  
2063  
2064  
2065  
2066  
2067  
2068  
2069  
2070  
2071  
2072  
2073  
2074  
2075  
2076  
2077  
2078  
2079  
2080  
2081  
2082  
2083  
2084  
2085  
2086  
2087  
2088  
2089  
2090  
2091  
2092  
2093  
2094  
2095  
2096  
2097  
2098  
2099  
2100  
2101  
2102  
2103  
2104  
2105  
2106  
2107  
2108  
2109  
2110  
2111  
2112  
2113  
2114  
2115  
2116  
2117  
2118  
2119  
2120  
2121  
2122  
2123  
2124  
2125  
2126  
2127  
2128  
2129  
2130  
2131  
2132  
2133  
2134  
2135  
2136  
2137  
2138  
2139  
2140  
2141  
2142  
2143  
2144  
2145  
2146  
2147  
2148  
2149  
2150  
2151  
2152  
2153  
2154  
2155  
2156  
2157  
2158  
2159  
2160  
2161  
2162  
2163  
2164  
2165  
2166  
2167  
2168  
2169  
2170  
2171  
2172  
2173  
2174  
2175  
2176  
2177  
2178  
2179  
2180  
2181  
2182  
2183  
2184  
2185  
2186  
2187  
2188  
2189  
2190  
2191  
2192  
2193  
2194  
2195  
2196  
2197  
2198  
2199  
2200  
2201  
2202  
22

12e

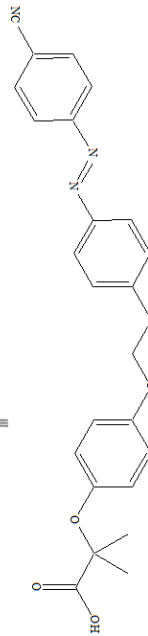

13C OBSERVE  
expt1 std13c  
SAMPLE DEC. & VT  
date May 16 2013 dfrq 300.199  
solvent CDCl3 dn H1  
file ACQUISITION exp dppwr 41  
75.432 dmf yyy  
at 1.815 dmf 11400  
nd 68106 1b PROCESSING 1.00  
sw 18761.7 1b wtf1e  
td 10400  
dpwr 8.7 fn not used  
d1 0 weff  
tof 0 wexp  
nt 14+08 wbs  
clock 29328 wnt  
gain not used  
flags  
11 n  
1h n  
dp DISPLAY y  
sp -1779.2  
wp 16986.2  
vs 179  
sc 0  
hCmm 54.295  
15 500.00  
rf1 1804.1  
rfp 0  
th 4  
ins no 100.000  
ph

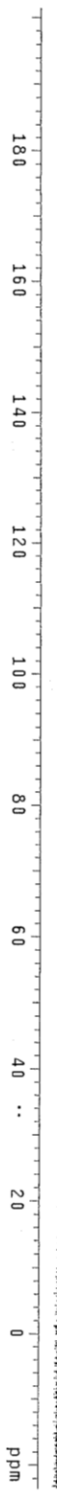



STANDARD 1H OBSERVE

12f

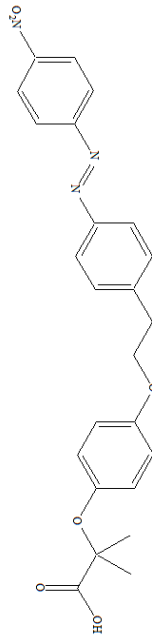

```
expt stdin
SAMPLE
date 18.2013 DEC. 8 VT
solvent cdcl3 dn 300.199
file ACQUISITION exp dpwr 30
strf 300.199 dm dof 0
IN 1.938 dm nm
ND 1.7880 dm nm
SW 4508.5 wfile PROCESSING 200
FB not used wfile ft
BS not used fn
IS 57 not used
IPWR 7.0 werr
DPR 1.000 werr
TOF 0 werr
NT 16 werr
CT 16 werr
atlock not used
gain not used
II n
IN n
DP Y
SP DISPLAY 102.8
WC 2893.42
SC 1.0
WC 265
hznm 10.993
IS 1 2027.12
FID 7091.4
TH 20
INS nm
nm cdc ph 100.000
```

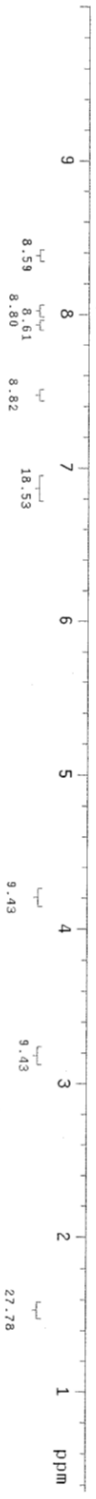

12f

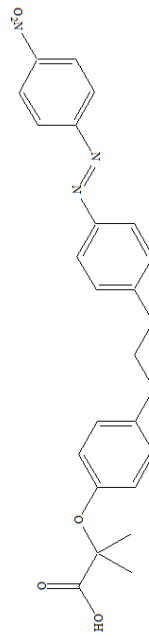

13C OBSERVE  
expt std13c  
date SAMPLE DEC. 4 VT  
Feb 18 2013 dfrq 300.199  
solvent CDCl3 dm 4  
11 ACQUISITION exp dof 4  
75.492 dm yyy  
C13 dm 11400  
at 1.815 cmf PROCESSING  
1828 1b 1.00  
fb 10400 wfile  
4 proc ft  
bs tpwr 62 fn not used  
pw 8.7 wgrf  
dl 0 wtdp  
nt 16+09 wds  
ct 31600 wnt  
atlock gain not used  
flags  
11 FLAOS n  
in n  
dp y  
DISPLAY  
sp 20.4  
wp 13534.62  
vc 0  
wc 265  
hzmm 51.07  
fs 500.00  
rfn 1004.4  
th 20  
nm no ph 100.000

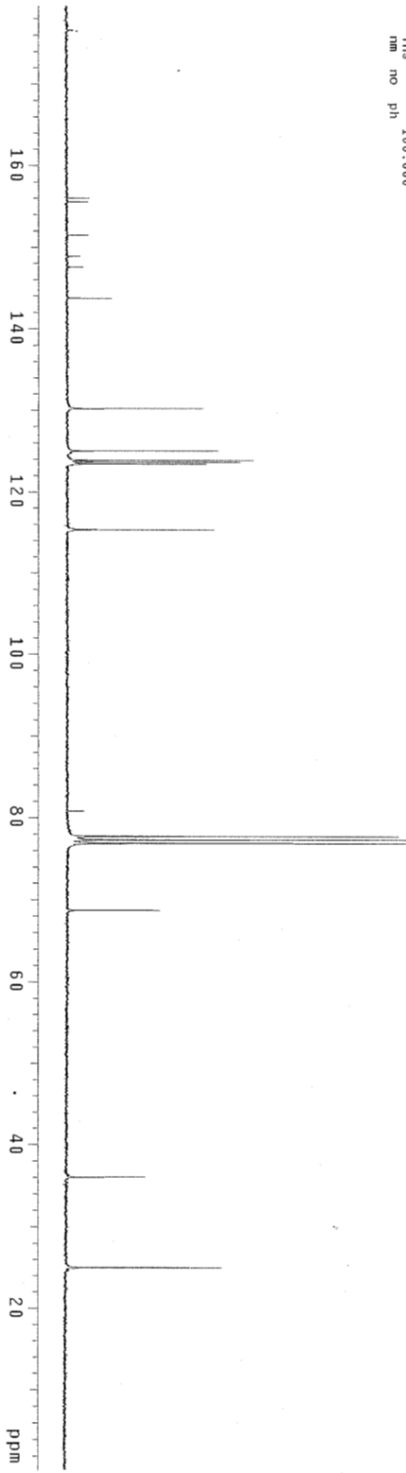

## References

- (1) Giampietro, L.; D'Angelo, A.; Giancristofaro, A.; Ammazalorso, A.; De Filippis, B.; Fantacuzzi, M.; Linciano, P.; Maccallini, C.; Amoroso, R. Synthesis and structure–activity relationships of fibrates-based analogues inside PPARs. *Bioorg. Med. Chem. Lett.* **2012**, *22*, 7662-7666.
- (2) Laghezza, A.; Pochetti, G.; Lavecchia, A. Fracchiolla, G.; Faliti, S.; Piemontese, L.; Di Giovanni, C.; Iacobazzi, V.; Infantino, V.; Montanari, R.; Capelli, D.; Tortorella, P.; Loiodice, F. New 2-(aryloxy)-3-phenylpropanoic acids as peroxisome proliferator-activated receptor  $\alpha/\gamma$  dual agonists able to upregulate mitochondrial carnitine shuttle system gene expression. *J. Med. Chem.* **2013**, *56*, 60-72.
- (3) Ammazalorso, A.; Carrieri, A.; Verginelli, F.; Bruno, I.; Carbonara, G.; D'Angelo, A.; De Filippis, B.; Fantacuzzi, M.; Florio, R.; Fracchiolla, G.; Giampietro, L.; Giancristofaro, A.; Maccallini, C.; Cama, A.; Amoroso, R. Synthesis, in vitro evaluation, and molecular modeling investigation of benzenesulfonimide peroxisome proliferator-activated receptors  $\alpha$  antagonists. *Eur. J. Med. Chem.* **2016**, *114*, 191-200.
- (4) Zhao, S.; Kanno, Y.; Li, W.; Wakatabi, H.; Sasaki, T.; Koike, K.; Nemoto, K.; Li, H. Picrasidine N is a subtype-selective PPAR $\beta/\delta$  agonist. *J. Nat. Prod.* **2016**, *79*, 879-885.
- (5) Cho, H.; Du, X.; Rizzi, J. P.; Liberzon, E.; Chakraborty, A. A.; Gao, W.; Carvo, I.; Signoretti, S.; Bruick, R. K.; Josey, J. A.; Wallace, E. M.; Kaelin, W. G. On-target efficacy of a HIF-2 $\alpha$  antagonist in preclinical kidney cancer models. *Nature* **2016**, *539*, 107-111.
- (6) Wallace, E. M.; Rizzi, J. P.; Han, G.; When, P. M.; Cao, Z.; Du, X.; Cheng, T.; Czerwinski, R. M.; Dixon, D. D.; Goggin, B. S.; Grina, J. A.; Halfmann, M. M.; Maddie, M. A.; Olive, S. R.; Schlachter, S. T.; Tan, H.; Wang, B.; Wang, K.; Xie, S.; Xu, R.; Yang, H.;

Josey, J. A. A small-molecule antagonist of HIF2 $\alpha$  is efficacious in preclinical models of renal cell carcinoma. *Cancer Res.* **2016**, *76*, 5491-500.

(7) Chiavaroli, A.; Brunetti, L.; Orlando, G.; Recinella, L.; Ferrante, C.; Leone, S.; Di Michele, P.; Di Nisio, C.; Vacca, M. Resveratrol inhibits isoprostane production in young and aged rat brain. *J. Biol. Regul. Homeost. Agents* **2010**, *24*, 441-446.

(8) Charan, J.; Kantharia, N. D. How to calculate sample size in animal studies? *J. Pharmacol. Pharmacother.* **2013**, *4*, 303-306.

(9) dos Santos, J. C.; Bernardes, A.; Giampietro, L.; Ammazalorso, A.; De Filippis, B.; Amoroso, R.; Polikarpov, I. Different binding and recognition modes of GL479, a dual agonist of Peroxisome Proliferator-Activated Receptor  $\alpha/\gamma$ . *J. Struct. Biol.* **2015**, *191*, 332-340.

(10) Wu, C.-C.; Baiga, T. J.; Downes, M.; La Clair, J. J.; Atkins, A. R.; Richard, S. B.; Fan, W.; Stockley-Noel, T. A.; Bowman, M. E.; Noel, J. P. Structural basis for specific ligation of the peroxisome proliferator-activated receptor  $\delta$ . *Proc. Natl. Acad. Sci. U. S. A.* **2017**, *114*, E2563-E2570.

(11) Verdonk ML, Cole JC, Hartshorn MJ, Murray CW, Taylor RD. Improved protein–ligand docking using GOLD. *Proteins: Struct. Funct. Genet.* *52*, 609– 623 (2003).

(12) Bottegoni G, Rocchia W, Recanatini M, Cavalli A ACIAP, autonomous hierarchical agglomerative cluster analysis based protocol to partition conformational datasets. *Bioinformatics* *22*, e58– e65 (2006).

(13) Pochetti, G.; Godio, C.; Mitro, N.; Caruso, D.; Galmozzi, A.; Scurati, S.; Loiodice, F.; Fracchiolla, G.; Tortorella, P.; Laghezza, A. Insights into the mechanism of partial agonism: crystal structures of the peroxisome proliferator-activated receptor  $\gamma$  ligand-binding domain in the complex with two enantiomeric ligands. *J. Biol. Chem.* **2007**, *282*, 17314-17324.
